# Supplementary material for: Titanium complexes with unsymmetrically substituted imidazolin-2-iminato ligands
Source: Royal Society of Chemistry journal article supplement (doi:10.1039/d2dt01740g), 2022-01-01
Supplement: d2dt01740g1.pdf [file d2dt01740g1.pdf]

*Supporting Information*

**Titanium complexes with unsymmetrical imidazolin-2-iminato ligands**

Marvin Koneczny,<sup>a</sup> Arife BÜsra Erol,<sup>a</sup> Marc Mauduit,<sup>b</sup> Moris Eisen,<sup>c</sup> and Matthias Tamm<sup>\*a</sup>

a. Institut für Anorganische und Analytische Chemie, Technische Universität Braunschweig, Hagenring 30, 38106 Braunschweig, Germany.

E-mail: [m.tamm@tu-bs.de](mailto:m.tamm@tu-bs.de)

b. Univ Rennes; Ecole Nationale Supérieure de Chimie de Rennes, CNRS, ISCR-UMR 6226, F-35000 Rennes, France

c. Schulich Faculty of Chemistry, Technion – Israel Institute of Technology, Technion City, 32000 Haifa, Israel

## Table of Contents

|                                                                                                              |    |
|--------------------------------------------------------------------------------------------------------------|----|
| 1. Spectra .....                                                                                             | 3  |
| 1.1 1-(Adamantyl)-3-(2,4,6-trimethylphenyl)-imidazolin-2-ylidene (1a).....                                   | 3  |
| 1.2 1-(Adamantyl)-3-(2,6-diisopropylphenyl)-imidazolin-2-ylidene (1b) .....                                  | 4  |
| 1.3 [Im <sup>AdMes</sup> NSiMe <sub>3</sub> ] (2a) .....                                                     | 5  |
| 1.4 [Im <sup>AdDipp</sup> NSiMe <sub>3</sub> ] (2b) .....                                                    | 6  |
| 1.5 [Im <sup>AdMes</sup> NH] (3a) .....                                                                      | 7  |
| 1.6 [Im <sup>AdDipp</sup> NH] (3b).....                                                                      | 8  |
| 1.7 [(Im <sup>AdMes</sup> N)TiCl <sub>3</sub> ] (4a).....                                                    | 9  |
| 1.8 [(Im <sup>AdDipp</sup> N)TiCl <sub>3</sub> ] (4b) .....                                                  | 10 |
| 1.9 [Cp(Im <sup>AdMes</sup> N)TiCl <sub>2</sub> ] (5a) .....                                                 | 11 |
| 1.10 [Cp(Im <sup>AdDipp</sup> N)TiCl <sub>2</sub> ] (5b).....                                                | 12 |
| 1.11 [(Im <sup>AdMes</sup> N) <sub>2</sub> TiCl <sub>2</sub> ] (6a).....                                     | 13 |
| 1.12 [(Im <sup>AdDipp</sup> N) <sub>2</sub> TiCl <sub>2</sub> ] (6b) .....                                   | 14 |
| 2. X-Ray Crystal Structure Determinations .....                                                              | 16 |
| 2.1 1-(Adamantyl)-3-(2,4,6-trimethylphenyl)-imidazolin-2-ylidene (1a).....                                   | 17 |
| 2.2 1-(Adamantyl)-3-(2,6-diisopropylphenyl)-imidazolin-2-ylidene (1b) .....                                  | 19 |
| 2.3 [(Im <sup>AdMes</sup> NSiMe <sub>3</sub> ] (2a) .....                                                    | 21 |
| 2.4 [Im <sup>AdMes</sup> NH] (3a) .....                                                                      | 23 |
| 2.5 [Im <sup>AdDipp</sup> NH] (3b).....                                                                      | 25 |
| 2.6 [(Im <sup>AdMes</sup> NH)TiCl <sub>3</sub> ] (4a) .....                                                  | 27 |
| 2.7 [(Im <sup>AdDipp</sup> N)TiCl <sub>3</sub> ] CH <sub>2</sub> Cl <sub>2</sub> ·Solv (4b) .....            | 29 |
| 2.8 [Cp(Im <sup>AdMes</sup> N)TiCl <sub>2</sub> ] (5a) .....                                                 | 31 |
| 2.9 [Cp(Im <sup>AdDipp</sup> N)TiCl <sub>2</sub> ] (5b).....                                                 | 33 |
| 2.10 [(Im <sup>AdMes</sup> N) <sub>2</sub> TiCl <sub>2</sub> ]·0.5CH <sub>2</sub> Cl <sub>2</sub> (6a) ..... | 35 |
| 2.11 [(Im <sup>AdDipp</sup> N) <sub>2</sub> TiCl <sub>2</sub> ]·CH <sub>2</sub> Cl <sub>2</sub> (6b).....    | 37 |

# 1. Spectra

## 1.1 1-(Adamantyl)-3-(2,4,6-trimethylphenyl)-imidazolin-2-ylidene (1a)

$^1\text{H}$  NMR (500 MHz,  $\text{C}_6\text{D}_6$ ) of **1a**:

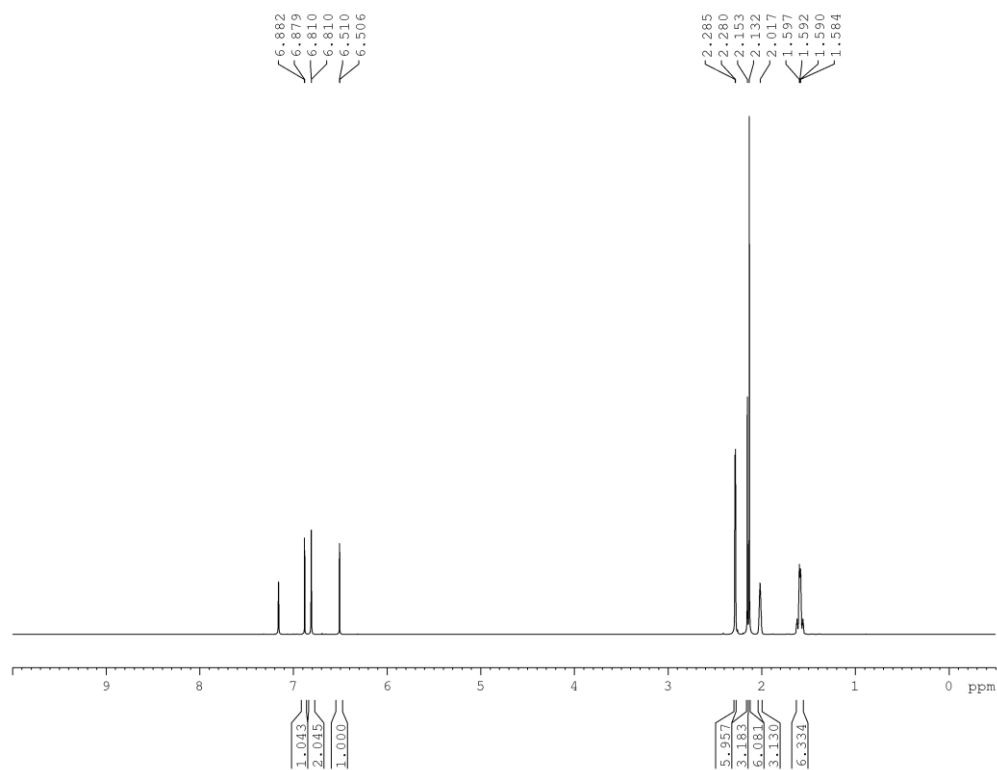

$^{13}\text{C}$  NMR (126 MHz,  $\text{C}_6\text{D}_6$ ) of **1a**:

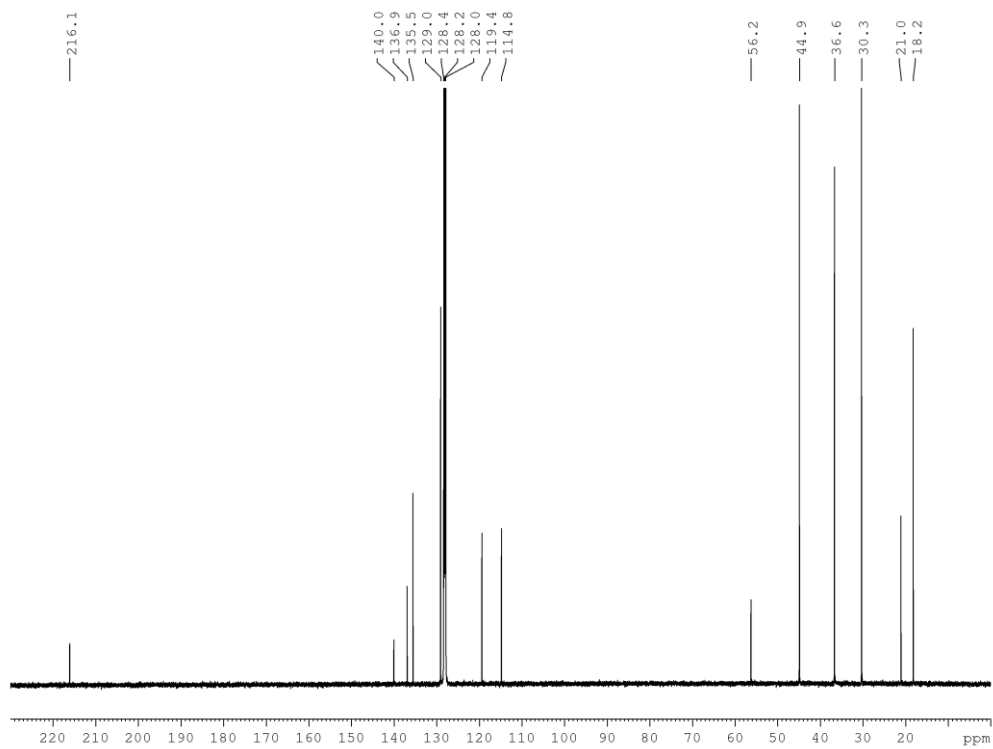

## 1.2 1-(Adamantyl)-3-(2,6-diisopropylphenyl)-imidazolin-2-ylidene (1b)

$^1\text{H}$  NMR (300 MHz,  $\text{C}_6\text{D}_6$ ) of **1b**:

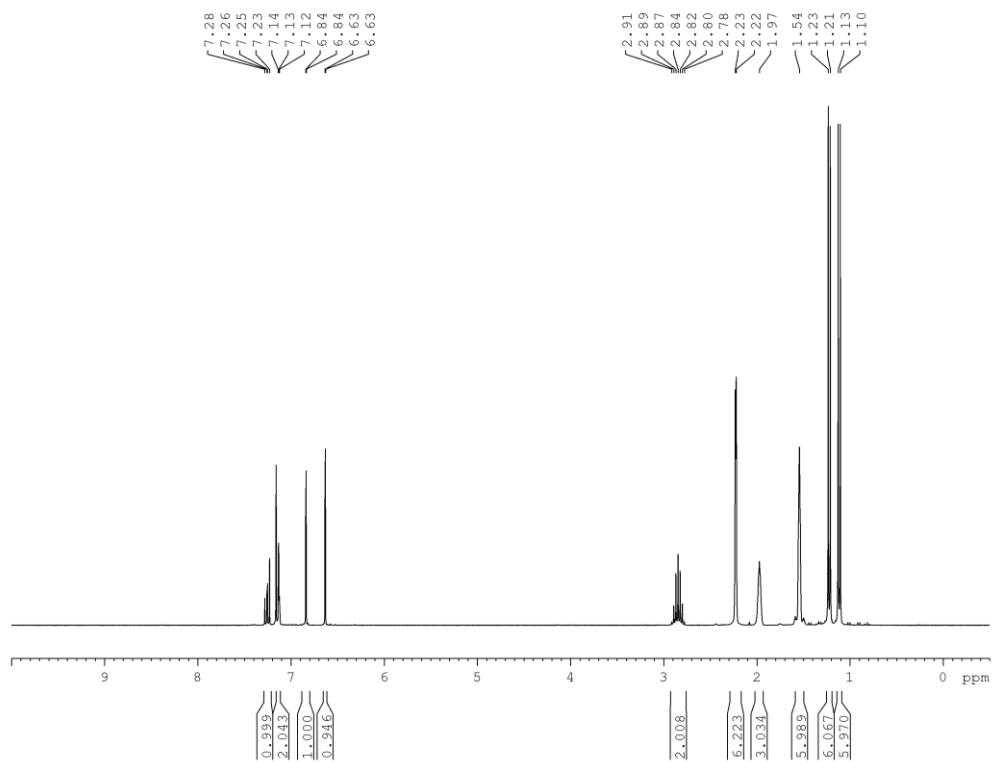

$^{13}\text{C}$  NMR (75 MHz,  $\text{C}_6\text{D}_6$ ) of **1b**:

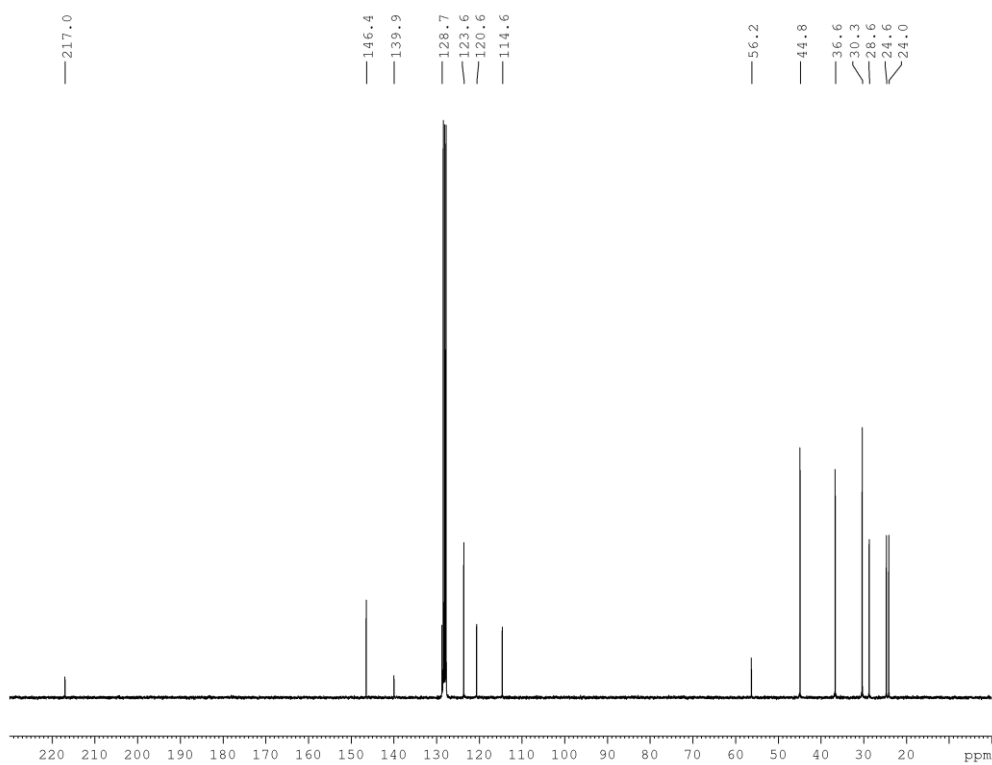

### 1.3 [Im<sup>AdMes</sup>NSiMe<sub>3</sub>] (2a)

<sup>1</sup>H NMR (500 MHz, C<sub>6</sub>D<sub>6</sub>) of 2a:

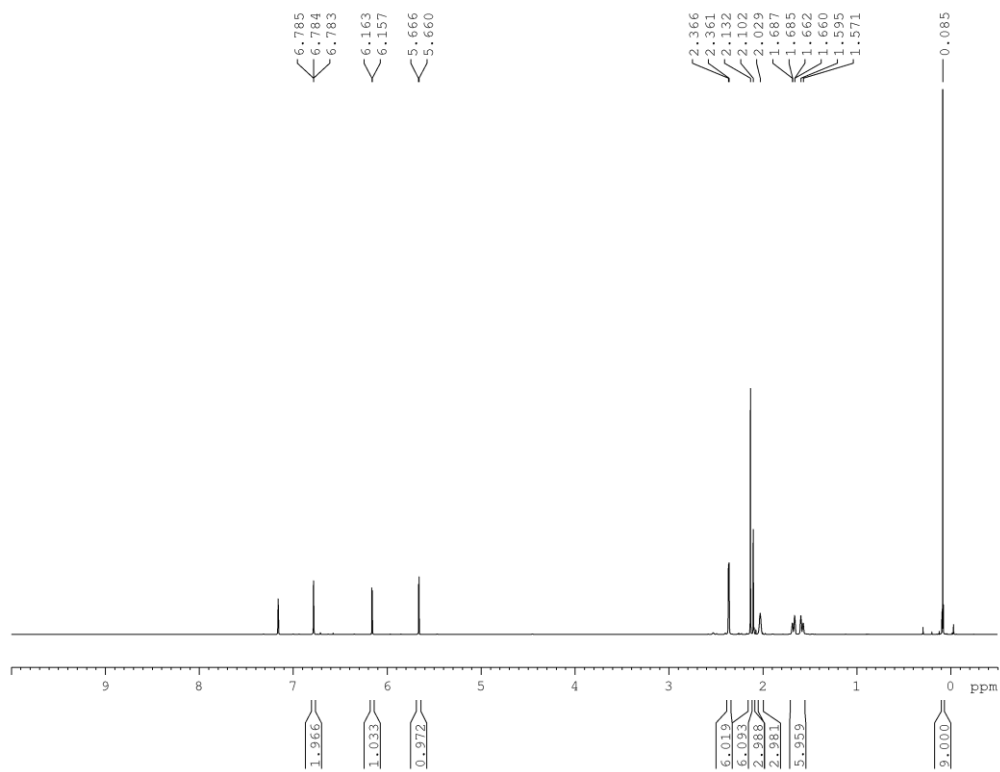

<sup>13</sup>C NMR (126 MHz, C<sub>6</sub>D<sub>6</sub>) of 2a:

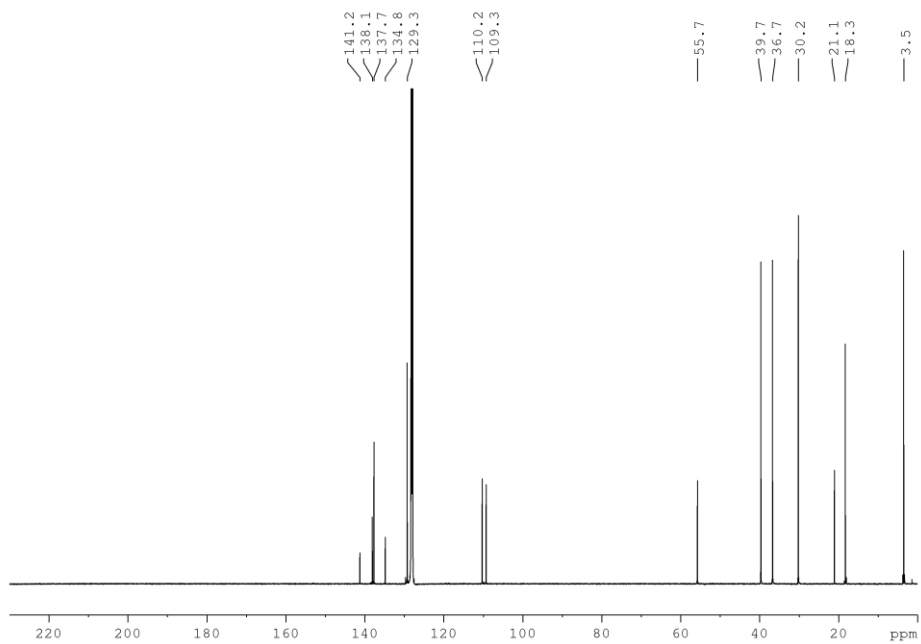

# 1.4 [Im<sup>Ad</sup>DippNSiMe<sub>3</sub>] (2b)

<sup>1</sup>H NMR (400 MHz, C<sub>6</sub>D<sub>6</sub>) of 2b:

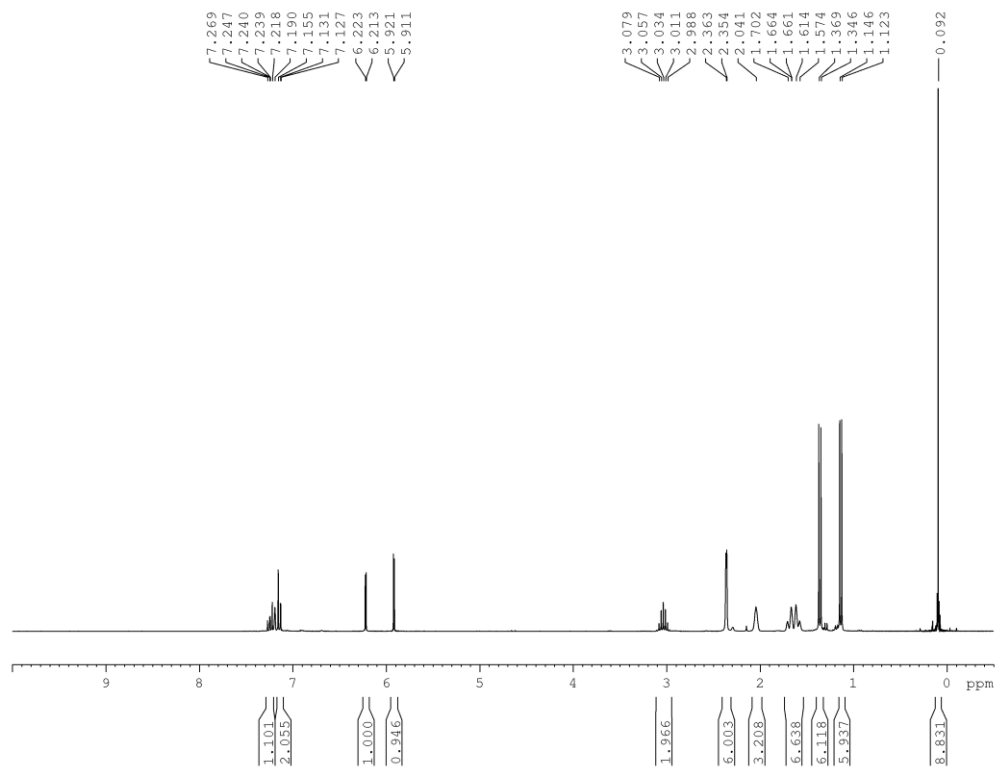

<sup>13</sup>C NMR (100 MHz, C<sub>6</sub>D<sub>6</sub>) of 2b:

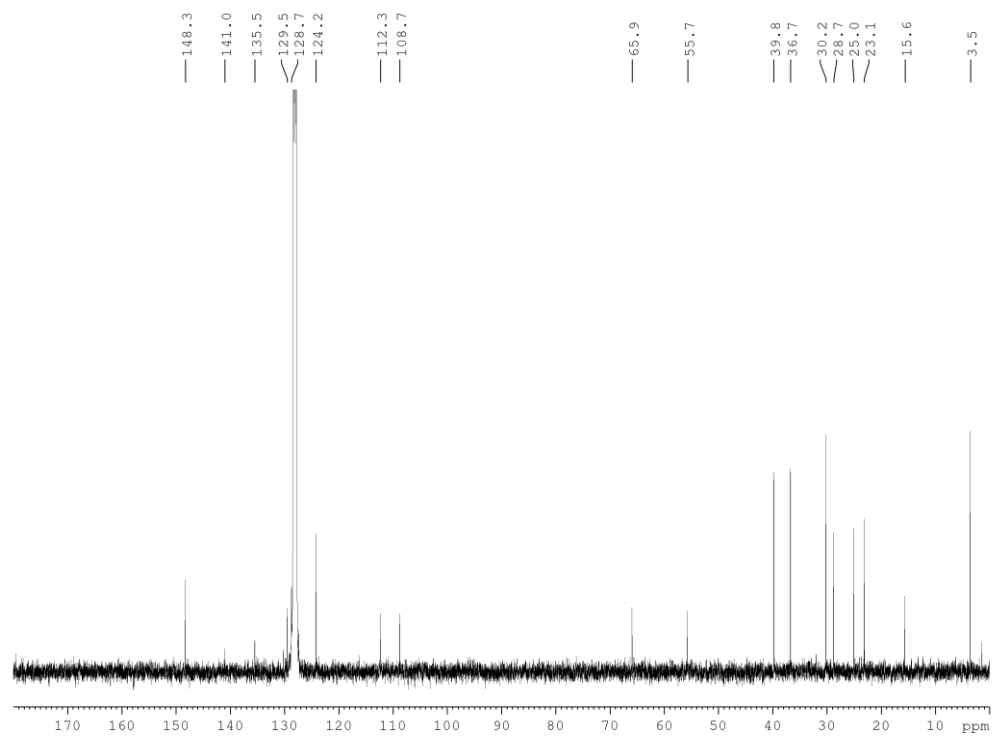

# 1.5 [Im<sup>AdMes</sup>NH] (3a)

<sup>1</sup>H NMR (400 MHz, C<sub>6</sub>D<sub>6</sub>) of 3a:

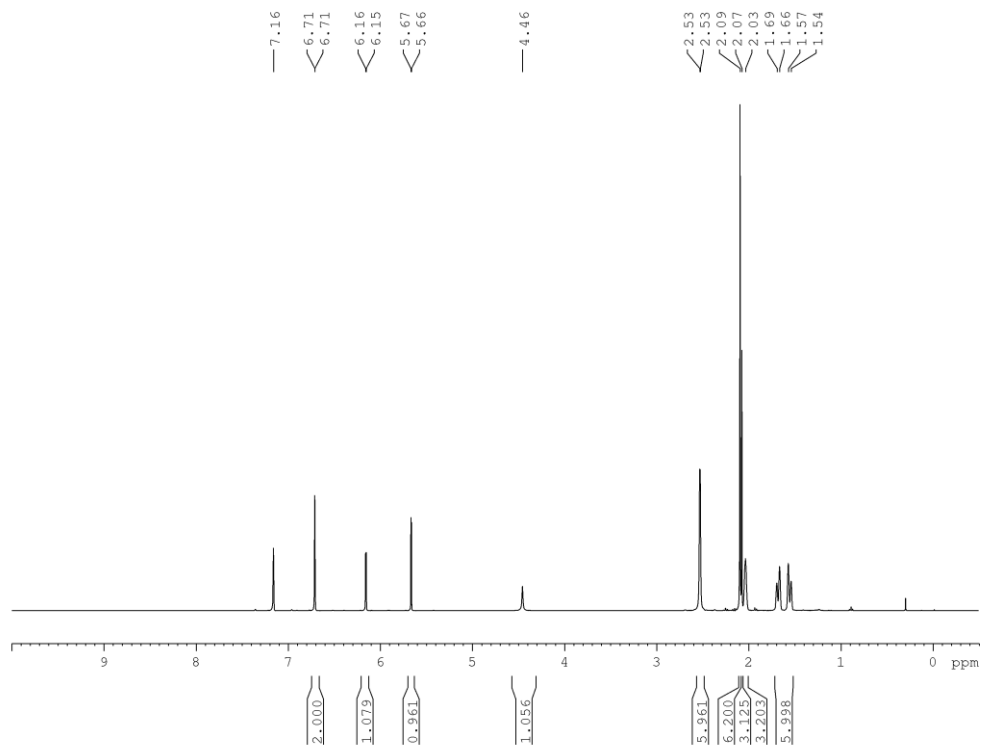

<sup>13</sup>C NMR (100 MHz, C<sub>6</sub>D<sub>6</sub>) of 3a:

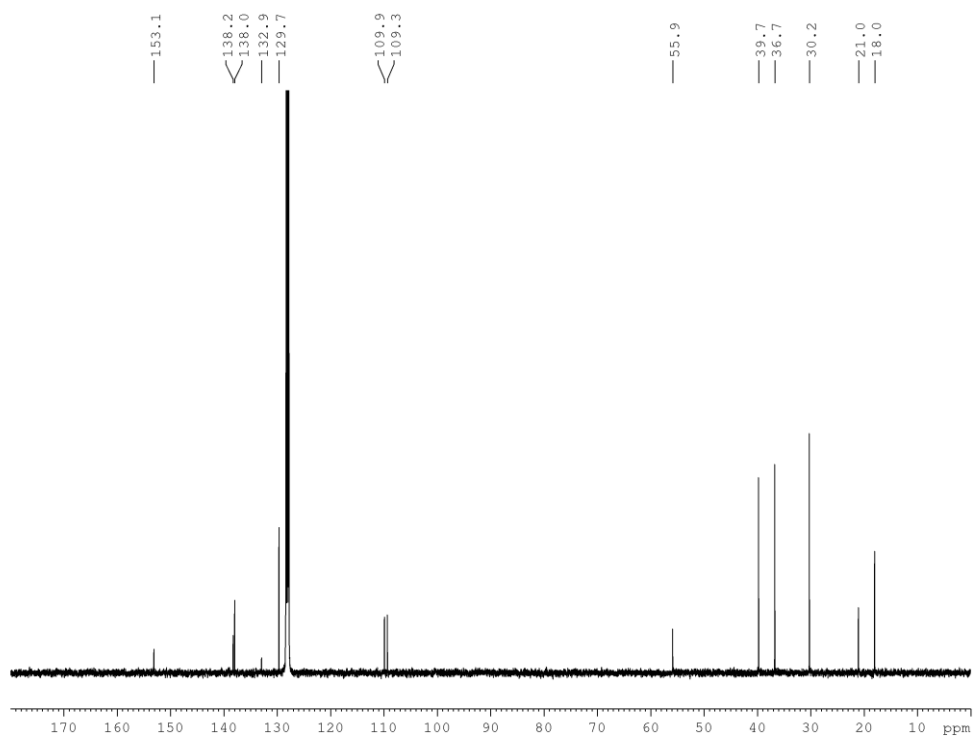

## 1.6 [Im<sup>Ad</sup>DippNH] (3b)

<sup>1</sup>H NMR (400 MHz, C<sub>6</sub>D<sub>6</sub>) of 3b:

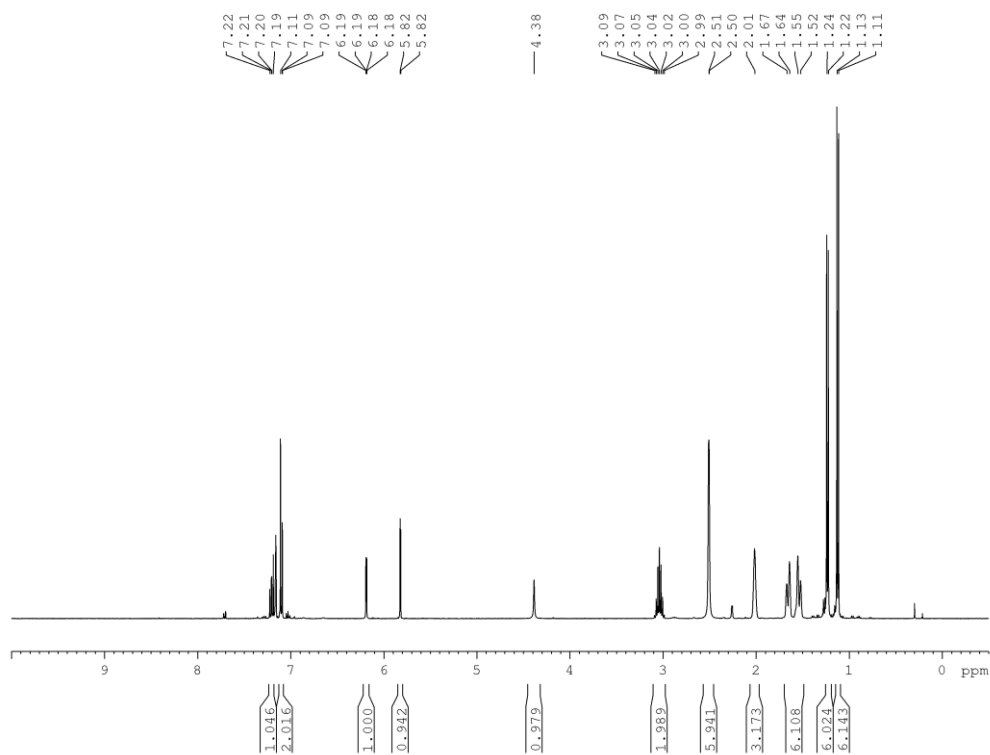

<sup>13</sup>C NMR (100 MHz, C<sub>6</sub>D<sub>6</sub>) of 3b:

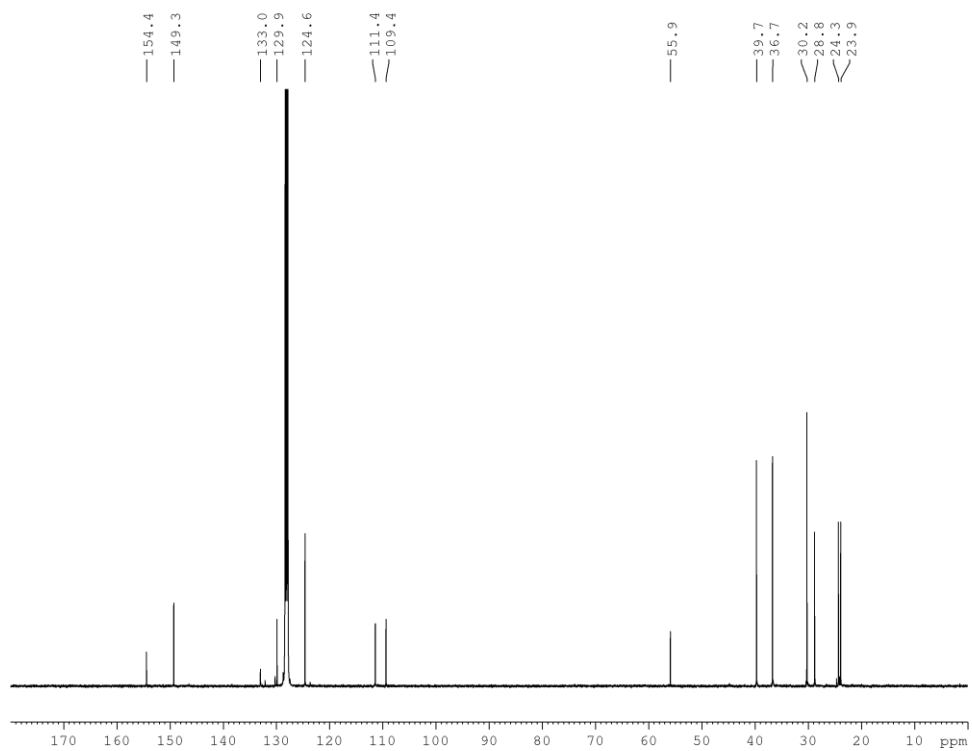



# 1.7 [(Im<sup>AdMes</sup>N)TiCl<sub>3</sub>] (4a)

<sup>1</sup>H NMR (500 MHz, CDCl<sub>3</sub>) of 4a:

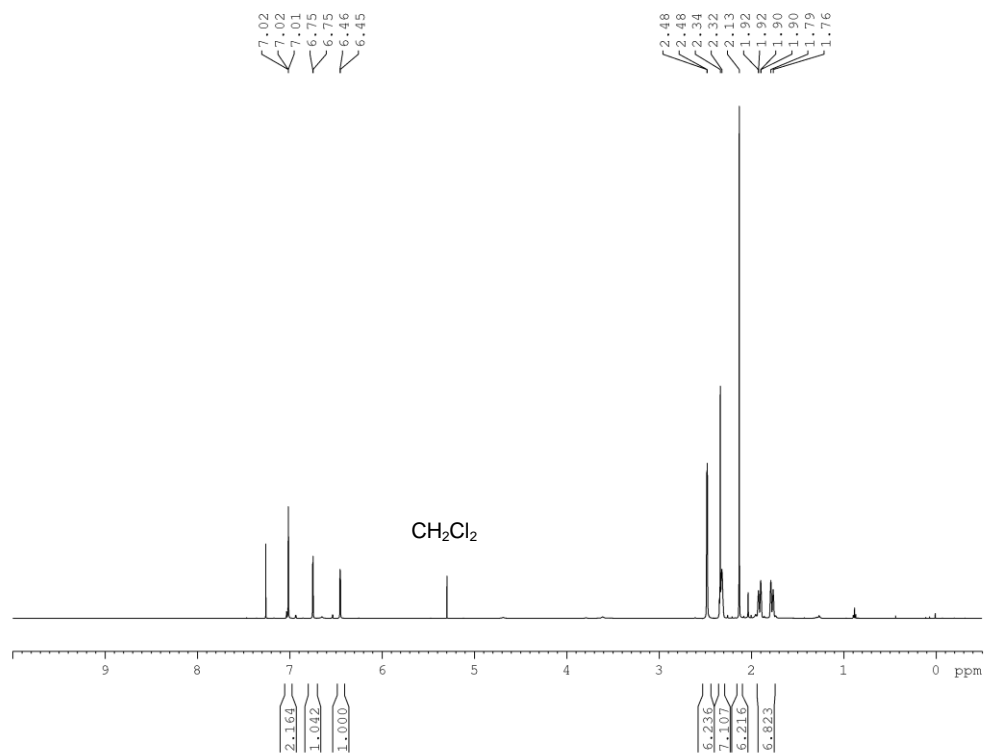

<sup>13</sup>C NMR (126 MHz, CDCl<sub>3</sub>) of 4a:

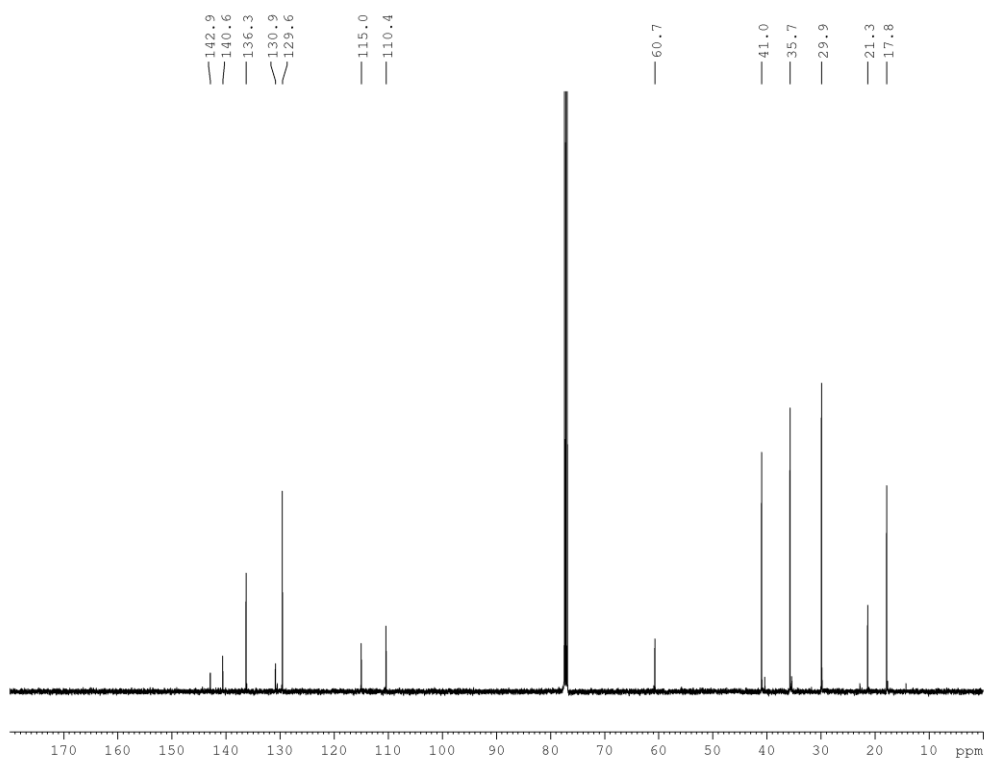

# 1.8 [(Im<sup>AdDipp</sup>N)TiCl<sub>3</sub>] (4b)

<sup>1</sup>H NMR (600 MHz, CDCl<sub>3</sub>) of 4b:

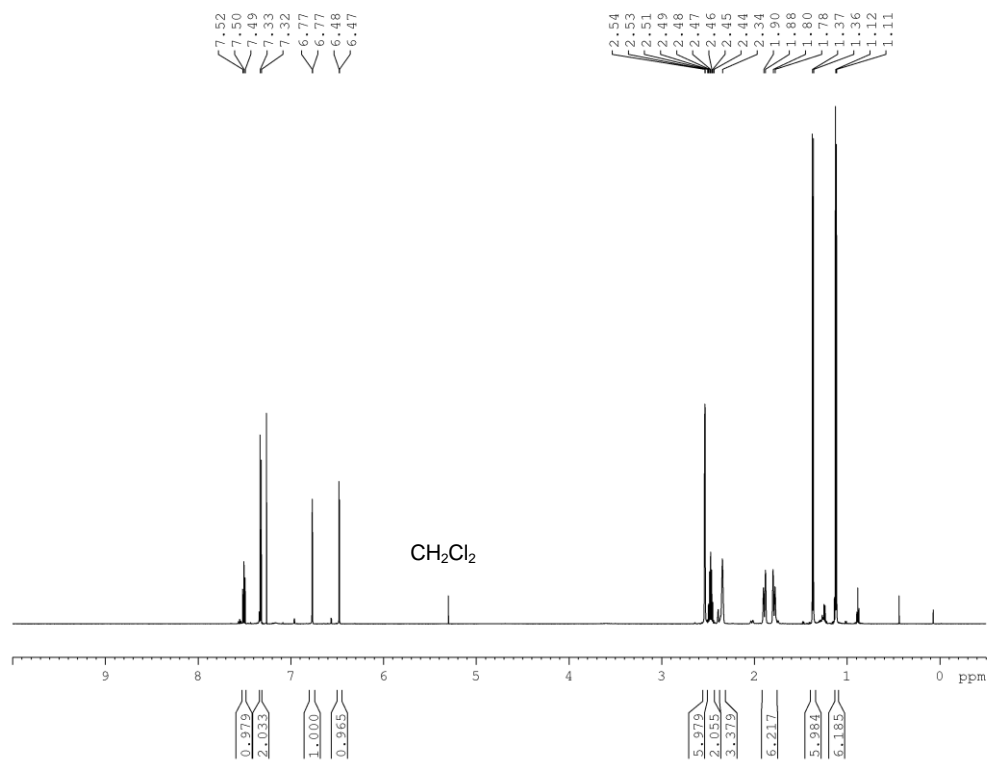

<sup>13</sup>C NMR (151 MHz, CDCl<sub>3</sub>) of 4b:

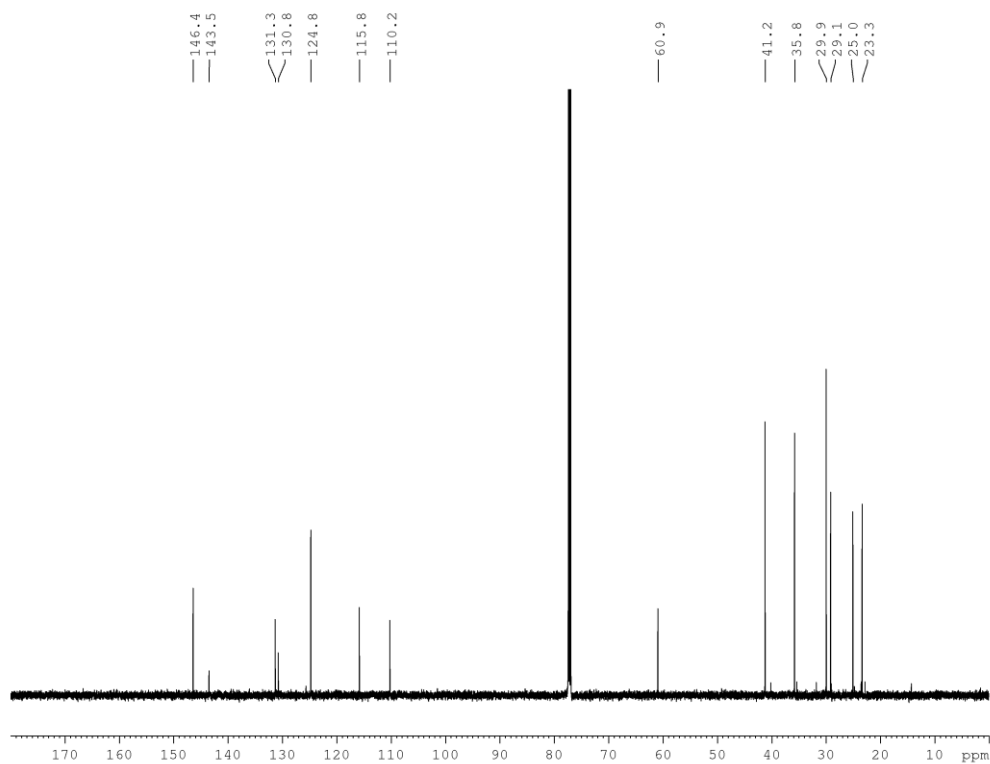

# 1.9 [Cp(Im<sup>AdMes</sup>N)TiCl<sub>2</sub>] (5a)

<sup>1</sup>H NMR (600 MHz, C<sub>6</sub>D<sub>6</sub>) of 5a:

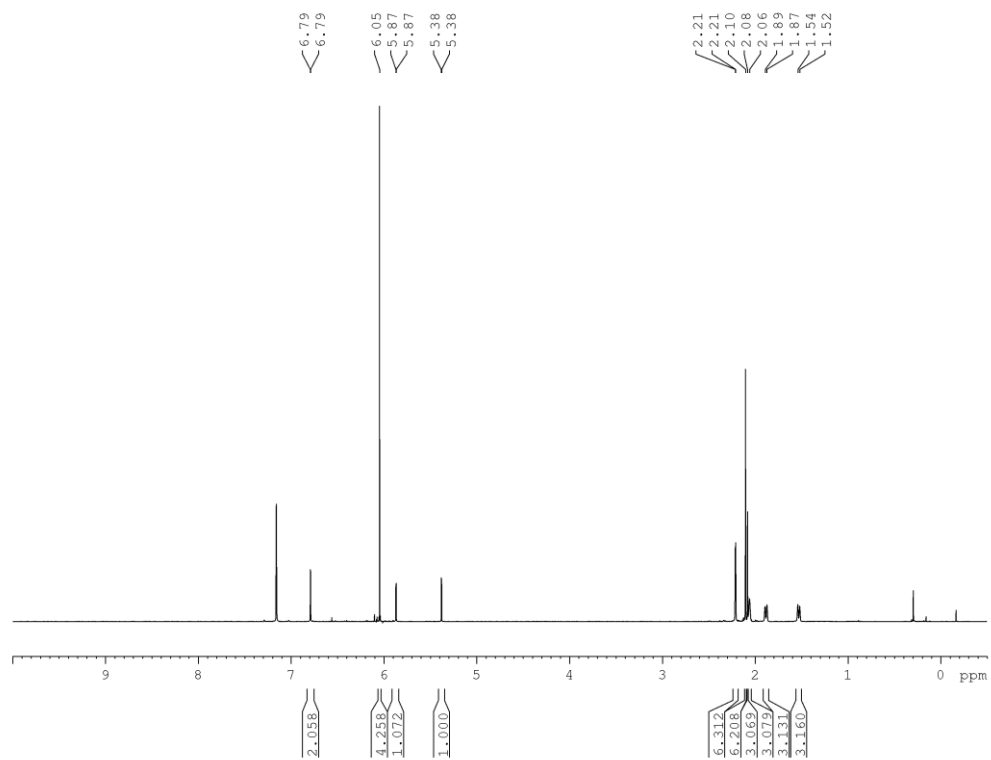

<sup>13</sup>C NMR (151 MHz, C<sub>6</sub>D<sub>6</sub>) of 5a:

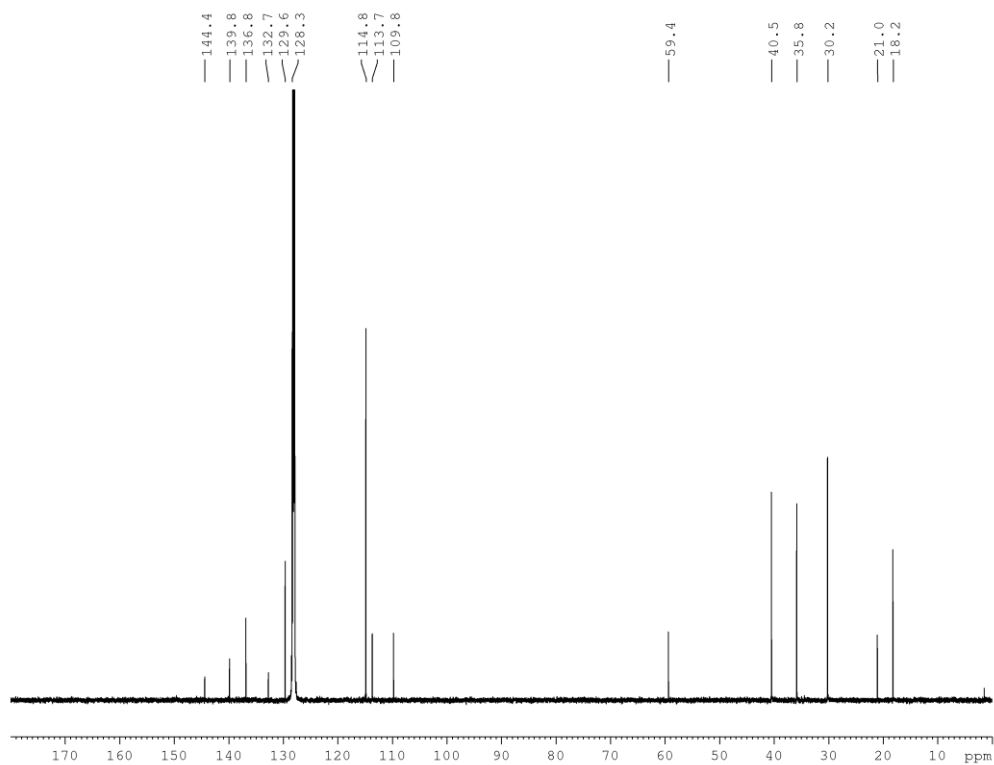

# 1.10 [Cp(Im<sup>AdDipp</sup>N)TiCl<sub>2</sub>] (5b)

<sup>1</sup>H NMR (500 MHz, CDCl<sub>3</sub>) of 5b:

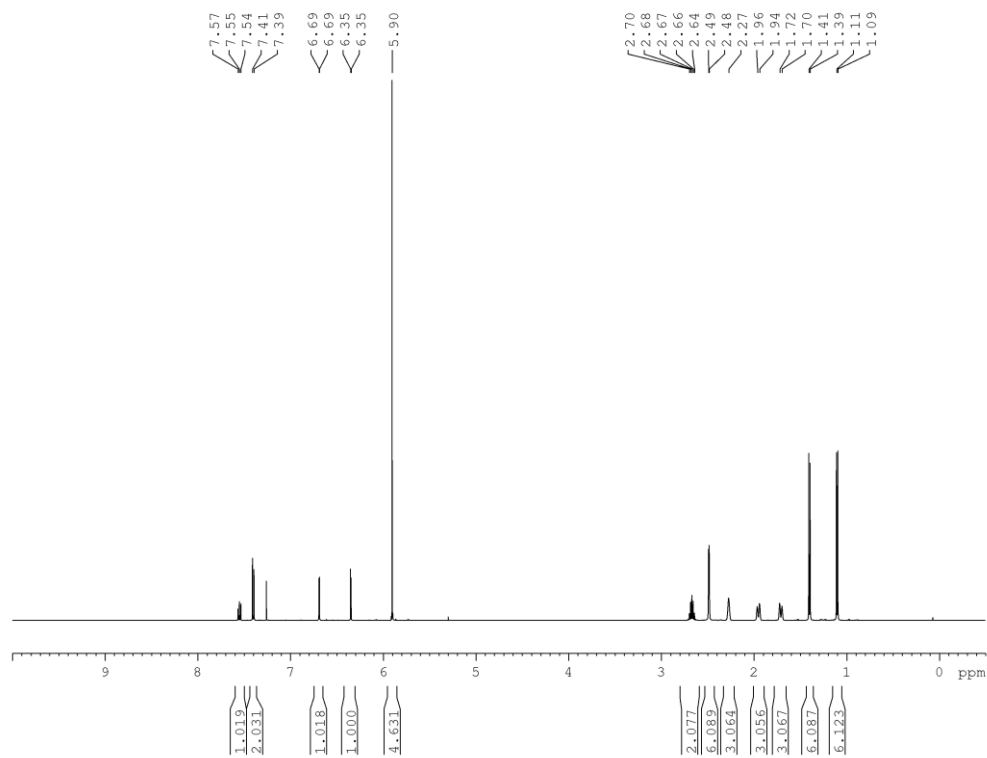

<sup>13</sup>C NMR (126 MHz, CDCl<sub>3</sub>) of 5b:

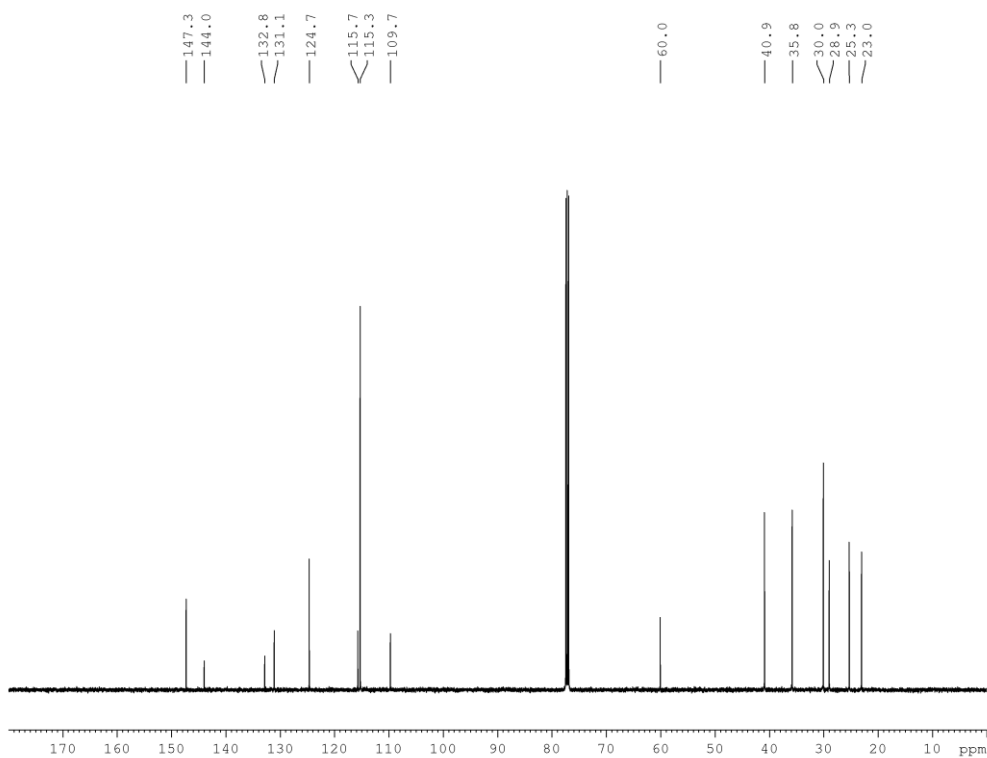

### 1.11 [(Im<sup>AdMes</sup>N)<sub>2</sub>TiCl<sub>2</sub>] (6a)

<sup>1</sup>H NMR (500 MHz, CDCl<sub>3</sub>) of 6a:

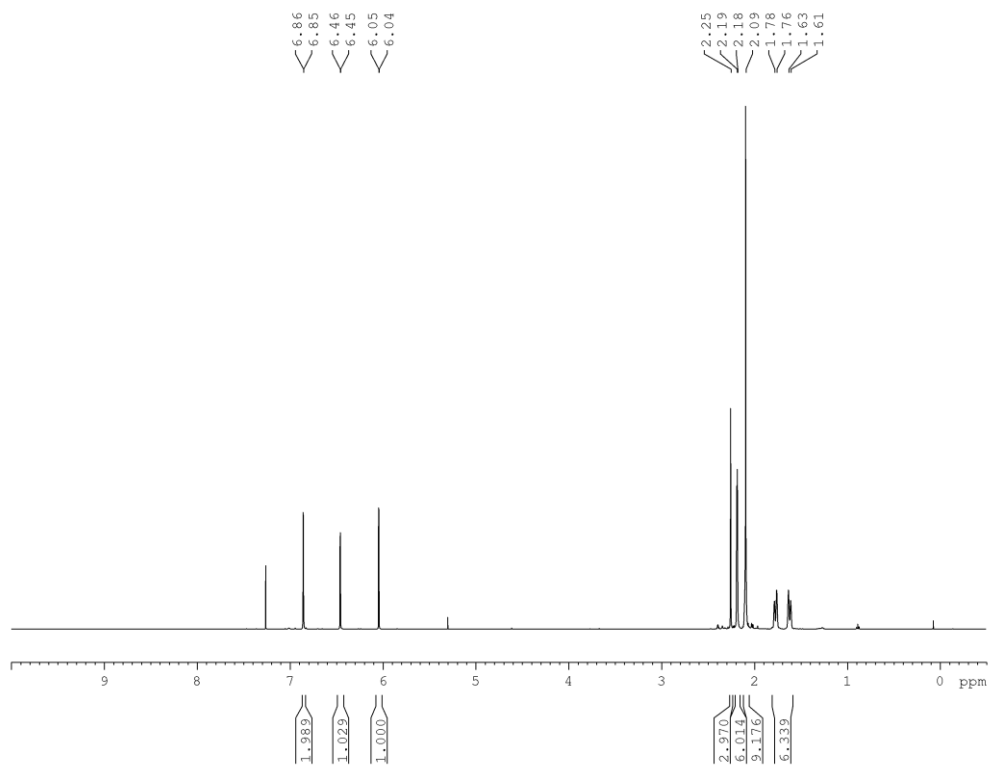

<sup>13</sup>C NMR (126 MHz, CDCl<sub>3</sub>) of 6a:

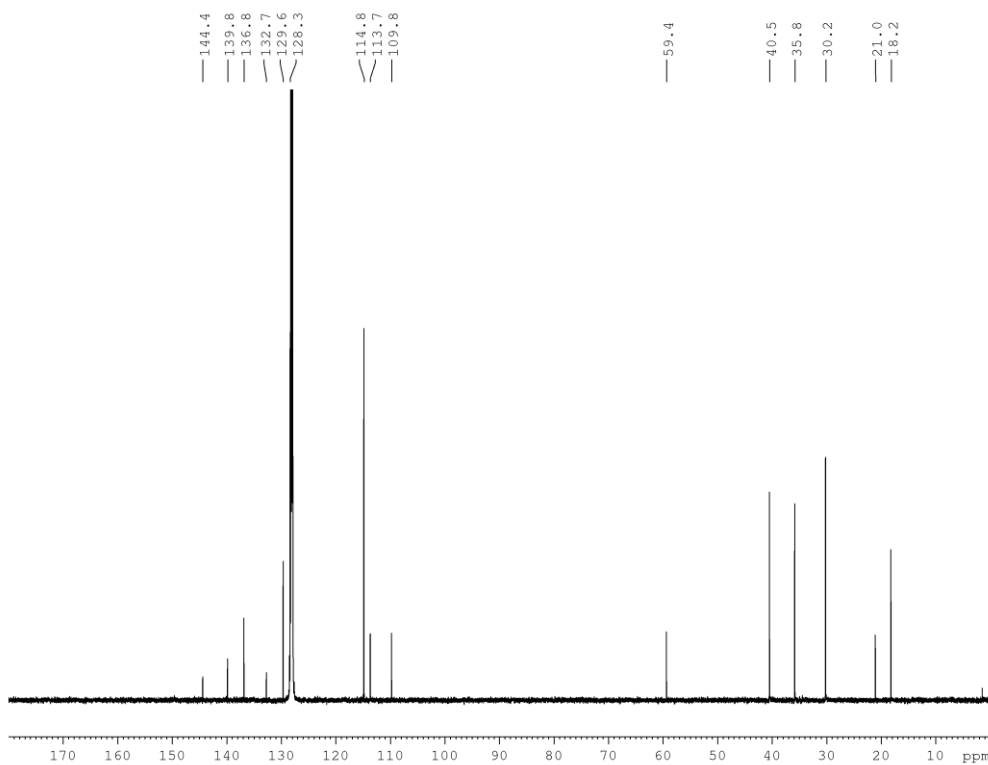

## 1.12 [(Im<sup>Ad</sup>DippN)<sub>2</sub>TiCl<sub>2</sub>] (6b)

<sup>1</sup>H NMR (500 MHz, CDCl<sub>3</sub>) of 6b:

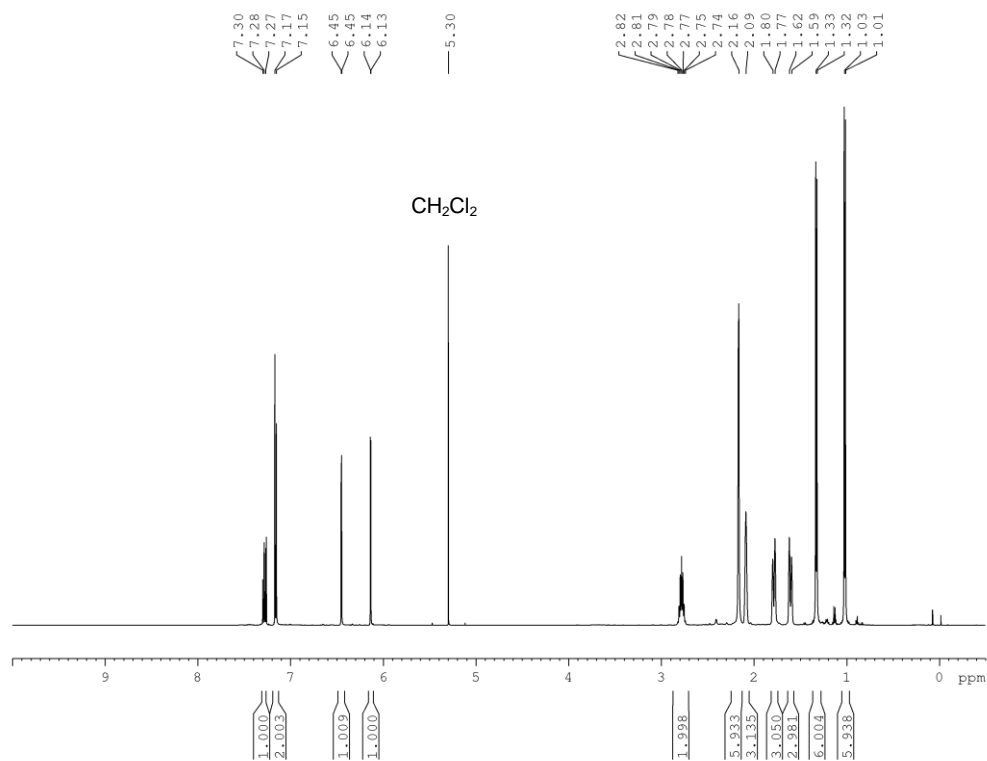

<sup>13</sup>C NMR (126 MHz, CDCl<sub>3</sub>) of 6b:

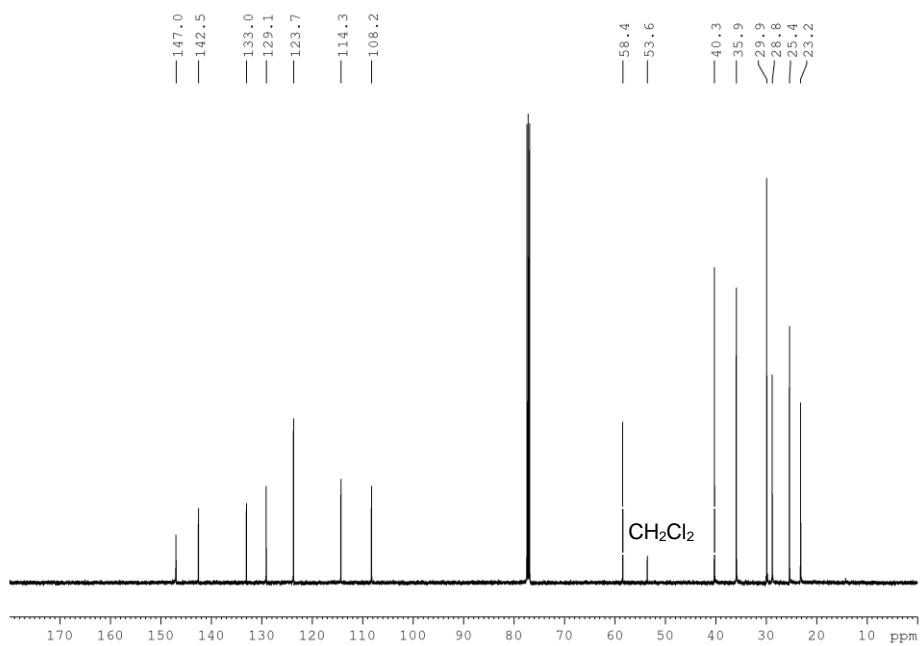

$^1\text{H}$  NMR (400 MHz,  $\text{CD}_2\text{Cl}_2$ ) of **6b** at  $-70\text{ }^\circ\text{C}$ :

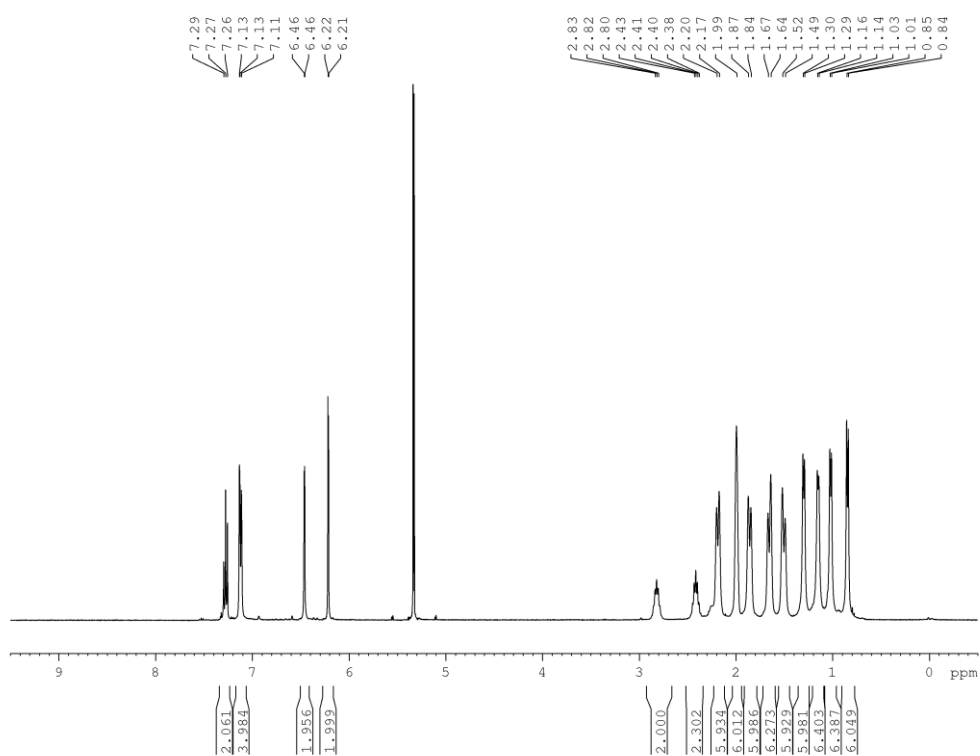

$^1\text{H}$  NMR (400 MHz,  $\text{CD}_2\text{Cl}_2$ ) of **6b** at variable temperatures; zoom-in to the aliphatic region:

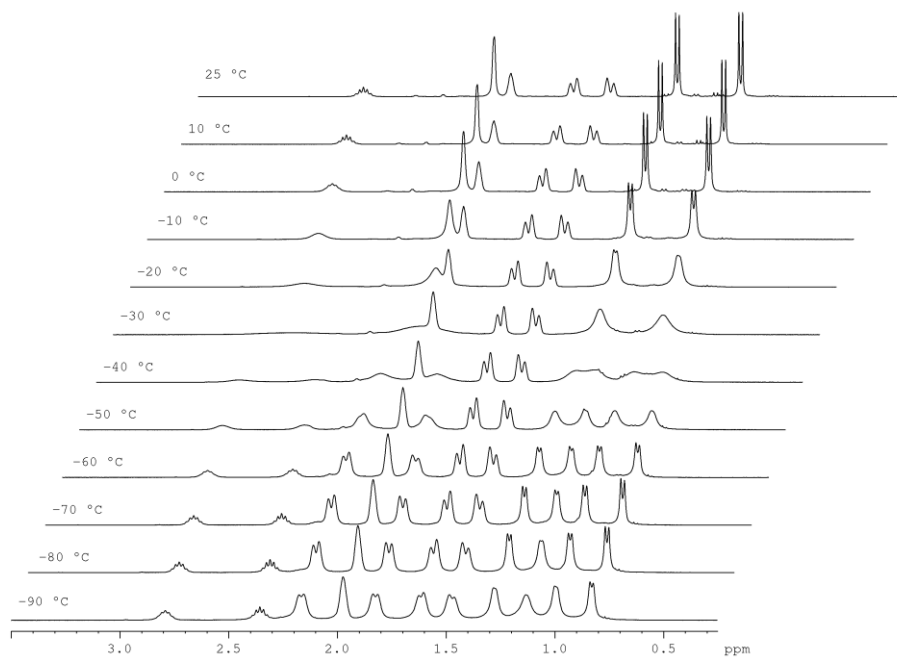

## 2. X-Ray Crystal Structure Determinations

For a summary of crystal data, see Tables S4.1 - 4.6. Crystals were mounted on either MiTiGen or Hampton mounts in perfluorinated inert oil. Intensity measurements were performed at 100 K using a Rigaku XtaLAB Synergy S Single Source with mirror-focussed CuK $\alpha$  radiation or a Rigaku XtaLAB Synergy S Single Source with mirror-focused MoK $\alpha$  radiation. Additional measurements were performed using an Oxford Diffraction Xcalibur Eos diffractometer with MoK $\alpha$  radiation. Data reduction was performed with the CrysAlisPRO software.[A] Absorption corrections were based on multi-scans, analytical methods or face-indexation using a gaussian grid. The structures solved using either direct methods in SHELXS[B] or intrinsic phasing in SHELXT[C] and were refined anisotropically on F2 using the program SHELXL[D] in OLEX2.[E] The hydrogen atoms were, unless otherwise noted, included either as constituents of idealized rigid methyl groups allowed to rotate but not tip, or using a riding model starting from calculated positions. The implementation of BYPASS[F] in OLEX2 had to be used for compound **4b**. One figure was created using the program Mercury[G].

CCDC 2174864-2174874 contain the supplementary crystallographic data for this paper. These data are provided free of charge by the Cambridge Crystallographic Data Centre.

References:

[A] Rigaku Oxford Diffraction, CrysAlisPRO Software System, Rigaku Corporation, Oxford, UK.

[B] G. M. Sheldrick, *Acta Cryst.* **2007**, *A64*, 112-122.

[C] G. M. Sheldrick, *Acta Cryst.* **2015**, *A71*, 3–8.

[D] G. M. Sheldrick, *Acta Cryst.* **2015**, *C71*, 3–8.

[E] O. V. Dolomanov, L. J. Bourhis, R. J. Gildea, J. A. K. Howard, H. Puschmann, *J. Appl. Cryst.* **2009**, *42*, 339–341.

[F] P. van der Sluis, A. L. Spek, *Acta Cryst.* **1990**, *A46*, 194-201.

[G] C. F. Macrae, I. Sovago, S. J. Cottrell, P. T. A. Galek, P. McCabe, E. Pidcock, M. Platings, G. P. Shields, J. S. Stevens, M. Towler et al., *J. Appl. Crystallogr.* **2020**, *53*, 226.



## 2.1 1-(Adamantyl)-3-(2,4,6-trimethylphenyl)-imidazolin-2-ylidene (1a)

|                                     |                                                                         |                      |
|-------------------------------------|-------------------------------------------------------------------------|----------------------|
| Identification code                 | mk31mk                                                                  |                      |
| CCDC Number:                        | 2174864                                                                 |                      |
| Empirical formula                   | C <sub>22</sub> H <sub>28</sub> N <sub>2</sub>                          |                      |
| Formula weight                      | 320.46                                                                  |                      |
| Temperature                         | 100(2) K                                                                |                      |
| Wavelength                          | 0.71073 Å                                                               |                      |
| Instrument (scan mode)              | XtaLAB Synergy, Single source HyPix ( $\omega$ scan)                    |                      |
| Crystal system                      | Monoclinic                                                              |                      |
| Space group                         | <i>P</i> 2 <sub>1</sub> / <i>c</i>                                      |                      |
| Unit cell dimensions                | <i>a</i> = 13.5173(4) Å                                                 | $\alpha$ = 90°       |
|                                     | <i>b</i> = 10.3836(2) Å                                                 | $\beta$ = 95.869(2)° |
|                                     | <i>c</i> = 12.8450(4) Å                                                 | $\gamma$ = 90°       |
| Volume                              | 1793.45(8) Å <sup>3</sup>                                               |                      |
| Z                                   | 4                                                                       |                      |
| Density (calculated)                | 1.187 Mg/m <sup>3</sup>                                                 |                      |
| Absorption coefficient              | 0.069 mm <sup>-1</sup>                                                  |                      |
| F(000)                              | 696                                                                     |                      |
| Crystal habitus                     | plate (colourless)                                                      |                      |
| Crystal size                        | 0.279 x 0.211 x 0.143 mm <sup>3</sup>                                   |                      |
| Theta range for data collection     | 2.478 to 44.855°                                                        |                      |
| Index ranges                        | -26 ≤ <i>h</i> ≤ 26, -20 ≤ <i>k</i> ≤ 20, -25 ≤ <i>l</i> ≤ 25           |                      |
| Reflections collected               | 134137                                                                  |                      |
| Independent reflections             | 14658 [R(int) = 0.0485]                                                 |                      |
| Completeness to theta = 25.242°     | 99.9 %                                                                  |                      |
| Absorption correction               | Semi-empirical from equivalents                                         |                      |
| Max. and min. transmission          | 1.00000 and 0.88245                                                     |                      |
| Refinement method                   | Full-matrix least-squares on F <sup>2</sup>                             |                      |
| Data / restraints / parameters      | 14658 / 0 / 220                                                         |                      |
| Goodness-of-fit on F <sup>2</sup>   | 1.066                                                                   |                      |
| Final R indices [I > 2σ(I)]         | R1 = 0.0441, wR2 = 0.1296                                               |                      |
| R indices (all data)                | R1 = 0.0624, wR2 = 0.1381                                               |                      |
| Largest diff. peak and hole         | 0.606 and -0.314 e.Å <sup>-3</sup>                                      |                      |
| Crystallisation Details:            | Toluol/n-Hexan -40°C                                                    |                      |
| Solution:                           | SHELXT-2014/5 (G. M. Sheldrick, Acta Cryst., 2015, A71, 3-8)            |                      |
| Refinement:                         | SHELXL-2018/3 (G. M. Sheldrick, Acta Cryst. (2008), A64, 112-122)       |                      |
| Interface:                          | OLEX2 v1.2 (O. V. Dolomanov et al., J. Appl. Cryst., 2009, 42, 339-341) |                      |
| Measurement and Refinement Details: | -                                                                       |                      |

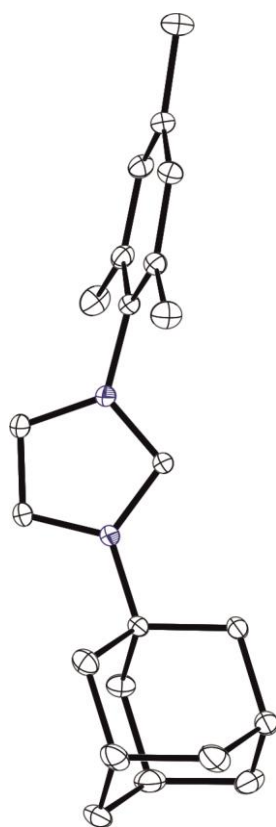

Figure S1: Molecular structure of **1a** with thermal displacement parameters drawn at 50% probability. All hydrogens are omitted for clarity. Selected bond lengths [Å] and angles [°]: C1-N1 1.3739(5), C1-N2 1.3651(5), N1-C4 1.4313(5), N2-C13 1.4711(6), N1-C1-N2 102.05(3).

## 2.2 1-(Adamantyl)-3-(2,6-diisopropylphenyl)-imidazolin-2-ylidene (1b)

|                                     |                                                                         |                     |
|-------------------------------------|-------------------------------------------------------------------------|---------------------|
| Identification code                 | mk28mk                                                                  |                     |
| CCDC Number:                        | 2174865                                                                 |                     |
| Empirical formula                   | C <sub>25</sub> H <sub>34</sub> N <sub>2</sub>                          |                     |
| Formula weight                      | 362.54                                                                  |                     |
| Temperature                         | 100(2) K                                                                |                     |
| Wavelength                          | 1.54184 Å                                                               |                     |
| Instrument (scan mode)              | XtaLAB Synergy, Single source, HyPix ( $\omega$ scan)                   |                     |
| Crystal system                      | Orthorhombic                                                            |                     |
| Space group                         | <i>Pnma</i>                                                             |                     |
| Unit cell dimensions                | a = 10.4134(2) Å                                                        | $\alpha = 90^\circ$ |
|                                     | b = 12.3697(2) Å                                                        | $\beta = 90^\circ$  |
|                                     | c = 16.5809(2) Å                                                        | $\gamma = 90^\circ$ |
| Volume                              | 2135.80(6) Å <sup>3</sup>                                               |                     |
| Z                                   | 4                                                                       |                     |
| Density (calculated)                | 1.127 Mg/m <sup>3</sup>                                                 |                     |
| Absorption coefficient              | 0.490 mm <sup>-1</sup>                                                  |                     |
| F(000)                              | 792                                                                     |                     |
| Crystal habitus                     | plate (colourless)                                                      |                     |
| Crystal size                        | 0.347 x 0.100 x 0.089 mm <sup>3</sup>                                   |                     |
| Theta range for data collection     | 4.460 to 77.393°                                                        |                     |
| Index ranges                        | -11 ≤ h ≤ 13, -15 ≤ k ≤ 15, -20 ≤ l ≤ 20                                |                     |
| Reflections collected               | 39788                                                                   |                     |
| Independent reflections             | 2337 [R(int) = 0.0431]                                                  |                     |
| Completeness to theta = 67.684°     | 100.0 %                                                                 |                     |
| Absorption correction               | Semi-empirical from equivalents                                         |                     |
| Max. and min. transmission          | 1.00000 and 0.47134                                                     |                     |
| Refinement method                   | Full-matrix least-squares on F <sup>2</sup>                             |                     |
| Data / restraints / parameters      | 2337 / 0 / 141                                                          |                     |
| Goodness-of-fit on F <sup>2</sup>   | 1.044                                                                   |                     |
| Final R indices [I > 2σ(I)]         | R1 = 0.0398, wR2 = 0.0995                                               |                     |
| R indices (all data)                | R1 = 0.0417, wR2 = 0.1013                                               |                     |
| Largest diff. peak and hole         | 0.216 and -0.194 e.Å <sup>-3</sup>                                      |                     |
| Crystallisation Details:            | toluene/ <i>n</i> -hexane -30 °C                                        |                     |
| Solution:                           | SHELXT-2014/5 (G. M. Sheldrick, Acta Cryst., 2015, A71, 3-8)            |                     |
| Refinement:                         | SHELXL-2018/3 (G. M. Sheldrick, Acta Cryst., 2008, A64, 112-122)        |                     |
| Interface:                          | OLEX2 v1.2 (O. V. Dolomanov et al., J. Appl. Cryst., 2009, 42, 339-341) |                     |
| Measurement and Refinement Details: | -                                                                       |                     |

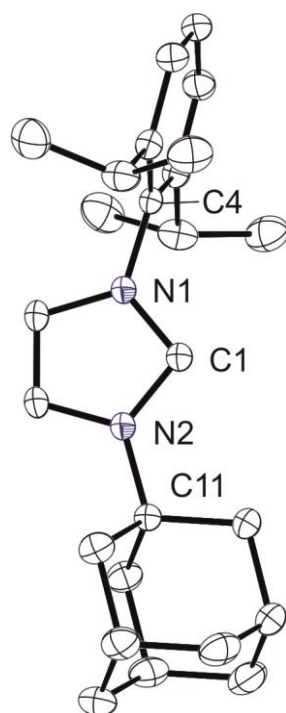

Figure S2: Molecular structure of **1b** with thermal displacement parameters drawn at 50% probability. All hydrogens are omitted for clarity. Selected bond lengths [Å] and angles [°]: C1-N1 1.3709(18), C1-N2 1.3627(18), N1-C4 1.4352(17), N2-C11 1.4765(17), N1-C1-N2 101.48(11).

### 2.3 [(Im<sup>AdMes</sup>NSiMe<sub>3</sub>) (2a)]

|                                     |                                                                                                                                 |
|-------------------------------------|---------------------------------------------------------------------------------------------------------------------------------|
| Identification code                 | mk17mk                                                                                                                          |
| CCDC Number:                        | 2174866                                                                                                                         |
| Empirical formula                   | C <sub>25</sub> H <sub>37</sub> N <sub>3</sub> Si                                                                               |
| Formula weight                      | 407.66                                                                                                                          |
| Temperature                         | 103(1) K                                                                                                                        |
| Wavelength                          | 0.71073 Å                                                                                                                       |
| Instrument (scan mode)              | Oxford Diffraction Xcalibur, Eos ( $\omega$ scan)                                                                               |
| Crystal system                      | Monoclinic                                                                                                                      |
| Space group                         | <i>P2<sub>1</sub>/n</i>                                                                                                         |
| Unit cell dimensions                | $a = 9.7011(4)$ Å $\alpha = 90^\circ$<br>$b = 24.1407(8)$ Å $\beta = 99.776(4)^\circ$<br>$c = 10.2311(4)$ Å $\gamma = 90^\circ$ |
| Volume                              | 2361.24(16) Å <sup>3</sup>                                                                                                      |
| Z                                   | 4                                                                                                                               |
| Density (calculated)                | 1.147 Mg/m <sup>3</sup>                                                                                                         |
| Absorption coefficient              | 0.115 mm <sup>-1</sup>                                                                                                          |
| F(000)                              | 888                                                                                                                             |
| Crystal habitus                     | irregular (colourless)                                                                                                          |
| Crystal size                        | 0.701 x 0.591 x 0.469 mm <sup>3</sup>                                                                                           |
| Theta range for data collection     | 2.291 to 36.316°                                                                                                                |
| Index ranges                        | -16 ≤ h ≤ 16, -40 ≤ k ≤ 40, -17 ≤ l ≤ 17                                                                                        |
| Reflections collected               | 121520                                                                                                                          |
| Independent reflections             | 11433 [R(int) = 0.0726]                                                                                                         |
| Completeness to theta = 25.242°     | 100.0 %                                                                                                                         |
| Absorption correction               | Gaussian                                                                                                                        |
| Max. and min. transmission          | 0.961 and 0.942                                                                                                                 |
| Refinement method                   | Full-matrix least-squares on F <sup>2</sup>                                                                                     |
| Data / restraints / parameters      | 11433 / 0 / 268                                                                                                                 |
| Goodness-of-fit on F <sup>2</sup>   | 1.040                                                                                                                           |
| Final R indices [I > 2σ(I)]         | R1 = 0.0457, wR2 = 0.1173                                                                                                       |
| R indices (all data)                | R1 = 0.0601, wR2 = 0.1258                                                                                                       |
| Largest diff. peak and hole         | 0.671 and -0.236 e.Å <sup>-3</sup>                                                                                              |
| Crystallisation Details:            | <i>n</i> -hexane at -27 °C                                                                                                      |
| Solution:                           | SHELXT-2014/5 (G. M. Sheldrick, Acta Cryst., 2015, A71, 3-8)                                                                    |
| Refinement:                         | SHELXL-2018/3 (G. M. Sheldrick, Acta Cryst. (2008), A64, 112-122)                                                               |
| Interface:                          | OLEX2 v1.2 (O. V. Dolomanov et al., J. Appl. Cryst., 2009, 42, 339-341)                                                         |
| Measurement and Refinement Details: | -                                                                                                                               |

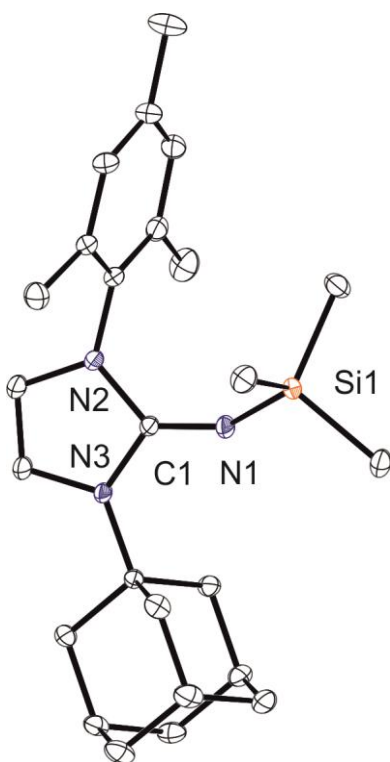

Figure S3: Molecular structure of **2a** with thermal displacement parameters drawn at 50% probability. All hydrogens are omitted for clarity. Selected bond lengths [Å] and angles [°]: C1-N1 1.2782(10), N1-Si1 1.6823(7), N2-C1-N3 103.99(6), C1-N1-Si1 142.68(7).

## 2.4 [Im<sup>AdMes</sup>NH] (3a)

|                                     |                                                                         |                     |
|-------------------------------------|-------------------------------------------------------------------------|---------------------|
| Identification code                 | mk18mk                                                                  |                     |
| CCDC Number:                        | 2174867                                                                 |                     |
| Empirical formula                   | C <sub>22</sub> H <sub>29</sub> N <sub>3</sub>                          |                     |
| Formula weight                      | 335.48                                                                  |                     |
| Temperature                         | 100(2) K                                                                |                     |
| Wavelength                          | 1.54184 Å                                                               |                     |
| Instrument (scan mode)              | XtaLAB Synergy, Single source, HyPix ( $\omega$ scan)                   |                     |
| Crystal system                      | Orthorhombic                                                            |                     |
| Space group                         | <i>Pbca</i>                                                             |                     |
| Unit cell dimensions                | a = 16.6873(2) Å                                                        | $\alpha = 90^\circ$ |
|                                     | b = 11.37240(10) Å                                                      | $\beta = 90^\circ$  |
|                                     | c = 19.4505(2) Å                                                        | $\gamma = 90^\circ$ |
| Volume                              | 3691.21(7) Å <sup>3</sup>                                               |                     |
| Z                                   | 8                                                                       |                     |
| Density (calculated)                | 1.207 Mg/m <sup>3</sup>                                                 |                     |
| Absorption coefficient              | 0.545 mm <sup>-1</sup>                                                  |                     |
| F(000)                              | 1456                                                                    |                     |
| Crystal habitus                     | fragment of trapezoid (colourless)                                      |                     |
| Crystal size                        | 0.108 x 0.101 x 0.099 mm <sup>3</sup>                                   |                     |
| Theta range for data collection     | 4.547 to 77.613°                                                        |                     |
| Index ranges                        | -21 ≤ h ≤ 21, -14 ≤ k ≤ 11, -24 ≤ l ≤ 24                                |                     |
| Reflections collected               | 41369                                                                   |                     |
| Independent reflections             | 3865 [R(int) = 0.0255]                                                  |                     |
| Completeness to theta = 67.684°     | 100.0 %                                                                 |                     |
| Absorption correction               | Gaussian                                                                |                     |
| Max. and min. transmission          | 1.000 and 0.793                                                         |                     |
| Refinement method                   | Full-matrix least-squares on F <sup>2</sup>                             |                     |
| Data / restraints / parameters      | 3865 / 0 / 233                                                          |                     |
| Goodness-of-fit on F <sup>2</sup>   | 1.043                                                                   |                     |
| Final R indices [I > 2σ(I)]         | R1 = 0.0408, wR2 = 0.1015                                               |                     |
| R indices (all data)                | R1 = 0.0429, wR2 = 0.1038                                               |                     |
| Largest diff. peak and hole         | 0.280 and -0.283 e.Å <sup>-3</sup>                                      |                     |
| Crystallisation Details:            | cooling of hot <i>n</i> -hexane solution to room temperature            |                     |
| Solution:                           | SHELXT-2014/5 (G. M. Sheldrick, Acta Cryst., 2015, A71, 3-8)            |                     |
| Refinement:                         | SHELXL-2018/3 (G. M. Sheldrick, Acta Cryst., 2008, A64, 112-122)        |                     |
| Interface:                          | OLEX2 v1.2 (O. V. Dolomanov et al., J. Appl. Cryst., 2009, 42, 339-341) |                     |
| Measurement and Refinement Details: | N-H hydrogen was refined freely.                                        |                     |

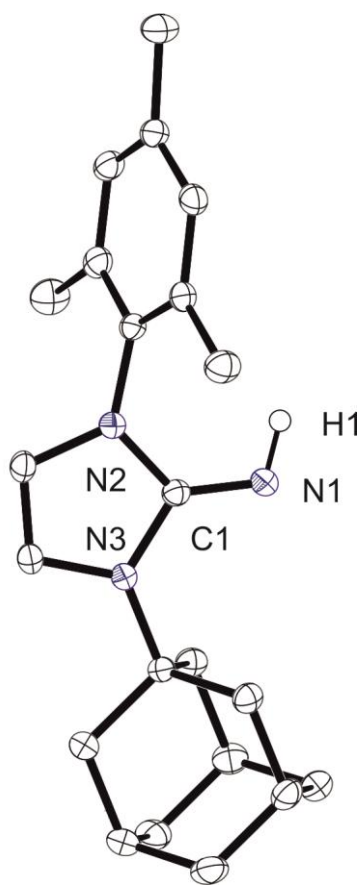

Figure S4: Molecular structure of **3a** with thermal displacement parameters drawn at 50% probability. All hydrogens are omitted for clarity. Selected bond lengths [ $\text{\AA}$ ] and angles [ $^\circ$ ]: C1-N1 1.2966(14), N2-C1-N3 104.55(9).



## 2.5 [Im<sup>AdDipp</sup>NH] (3b)

|                                     |                                                                         |                      |
|-------------------------------------|-------------------------------------------------------------------------|----------------------|
| Identification code                 | mk15mk                                                                  |                      |
| CCDC Number:                        | 2174868                                                                 |                      |
| Empirical formula                   | C <sub>25</sub> H <sub>35</sub> N <sub>3</sub>                          |                      |
| Formula weight                      | 377.56                                                                  |                      |
| Temperature                         | 100(2) K                                                                |                      |
| Wavelength                          | 1.54184 Å                                                               |                      |
| Instrument (scan mode)              | XtaLAB Synergy, Single source, HyPix ( $\omega$ scan)                   |                      |
| Crystal system                      | Monoclinic                                                              |                      |
| Space group                         | <i>P</i> 2 <sub>1</sub> / <i>c</i>                                      |                      |
| Unit cell dimensions                | <i>a</i> = 13.8605(1) Å                                                 | $\alpha$ = 90°       |
|                                     | <i>b</i> = 6.5130(1) Å                                                  | $\beta$ = 98.599(1)° |
|                                     | <i>c</i> = 24.0076(2) Å                                                 | $\gamma$ = 90°       |
| Volume                              | 2142.89(4) Å <sup>3</sup>                                               |                      |
| Z                                   | 4                                                                       |                      |
| Density (calculated)                | 1.170 Mg/m <sup>3</sup>                                                 |                      |
| Absorption coefficient              | 0.521 mm <sup>-1</sup>                                                  |                      |
| F(000)                              | 824                                                                     |                      |
| Crystal habitus                     | lath (colourless)                                                       |                      |
| Crystal size                        | 0.352 x 0.067 x 0.039 mm <sup>3</sup>                                   |                      |
| Theta range for data collection     | 3.225 to 77.449°                                                        |                      |
| Index ranges                        | -17 ≤ <i>h</i> ≤ 17, -6 ≤ <i>k</i> ≤ 8, -30 ≤ <i>l</i> ≤ 30             |                      |
| Reflections collected               | 47042                                                                   |                      |
| Independent reflections             | 4470 [R(int) = 0.0319]                                                  |                      |
| Completeness to theta = 67.684°     | 100.0 %                                                                 |                      |
| Absorption correction               | Gaussian                                                                |                      |
| Max. and min. transmission          | 1.000 and 0.784                                                         |                      |
| Refinement method                   | Full-matrix least-squares on F <sup>2</sup>                             |                      |
| Data / restraints / parameters      | 4470 / 0 / 261                                                          |                      |
| Goodness-of-fit on F <sup>2</sup>   | 1.038                                                                   |                      |
| Final R indices [I > 2σ(I)]         | R1 = 0.0378, wR2 = 0.0967                                               |                      |
| R indices (all data)                | R1 = 0.0401, wR2 = 0.0998                                               |                      |
| Largest diff. peak and hole         | 0.265 and -0.212 e.Å <sup>-3</sup>                                      |                      |
| Crystallisation Details:            | <i>n</i> -hexane -40 °C                                                 |                      |
| Solution:                           | SHELXT-2014/5 (G. M. Sheldrick, Acta Cryst., 2015, A71, 3-8)            |                      |
| Refinement:                         | SHELXL-2018/3 (G. M. Sheldrick, Acta Cryst., 2008, A64, 112-122)        |                      |
| Interface:                          | OLEX2 v1.2 (O. V. Dolomanov et al., J. Appl. Cryst., 2009, 42, 339-341) |                      |
| Measurement and Refinement Details: | N-H hydrogen was refined freely.                                        |                      |

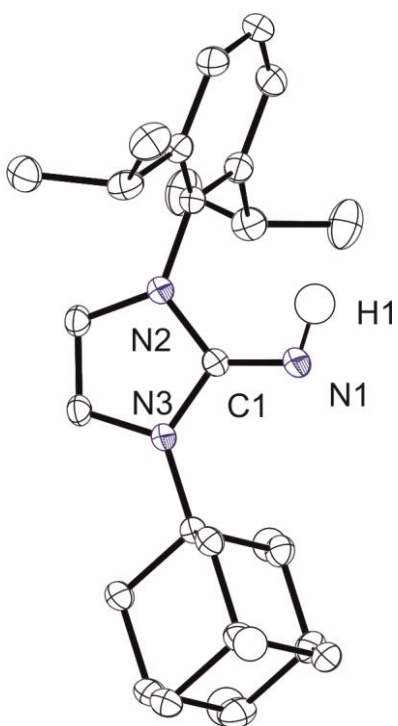

Figure S5: Molecular structure of **3b** with thermal displacement parameters drawn at 50% probability. All hydrogens are omitted for clarity. Selected bond lengths [ $\text{\AA}$ ] and angles [ $^\circ$ ]: C1-N1 1.2891(13), N2-C1-N3 104.78(8).

## 2.6 [(Im<sup>AdMes</sup>NH)TiCl<sub>3</sub>] (4a)

|                                     |                                                                         |                      |
|-------------------------------------|-------------------------------------------------------------------------|----------------------|
| Identification code                 | mk23mk                                                                  |                      |
| CCDC Number:                        | 2174869                                                                 |                      |
| Empirical formula                   | C <sub>22</sub> H <sub>28</sub> Cl <sub>3</sub> N <sub>3</sub> Ti       |                      |
| Formula weight                      | 488.72                                                                  |                      |
| Temperature                         | 100(2) K                                                                |                      |
| Wavelength                          | 0.71073 Å                                                               |                      |
| Instrument (scan mode)              | XtaLAB Synergy, Single source, HyPix ( $\omega$ scan)                   |                      |
| Crystal system                      | Monoclinic                                                              |                      |
| Space group                         | <i>P</i> 2 <sub>1</sub> / <i>n</i>                                      |                      |
| Unit cell dimensions                | <i>a</i> = 9.6555(2) Å                                                  | $\alpha$ = 90°       |
|                                     | <i>b</i> = 23.9142(3) Å                                                 | $\beta$ = 98.744(2)° |
|                                     | <i>c</i> = 10.2854(2) Å                                                 | $\gamma$ = 90°       |
| Volume                              | 2347.33(7) Å <sup>3</sup>                                               |                      |
| Z                                   | 4                                                                       |                      |
| Density (calculated)                | 1.383 Mg/m <sup>3</sup>                                                 |                      |
| Absorption coefficient              | 0.720 mm <sup>-1</sup>                                                  |                      |
| F(000)                              | 1016                                                                    |                      |
| Crystal habitus                     | irregular (orange)                                                      |                      |
| Crystal size                        | 0.370 x 0.269 x 0.100 mm <sup>3</sup>                                   |                      |
| Theta range for data collection     | 2.731 to 41.154°                                                        |                      |
| Index ranges                        | -17 ≤ <i>h</i> ≤ 17, -44 ≤ <i>k</i> ≤ 44, -19 ≤ <i>l</i> ≤ 19           |                      |
| Reflections collected               | 209853                                                                  |                      |
| Independent reflections             | 15591 [R(int) = 0.0354]                                                 |                      |
| Completeness to theta = 25.242°     | 99.8 %                                                                  |                      |
| Absorption correction               | Gaussian                                                                |                      |
| Max. and min. transmission          | 1.000 and 0.272                                                         |                      |
| Refinement method                   | Full-matrix least-squares on F <sup>2</sup>                             |                      |
| Data / restraints / parameters      | 15591 / 0 / 265                                                         |                      |
| Goodness-of-fit on F <sup>2</sup>   | 1.051                                                                   |                      |
| Final R indices [I > 2σ(I)]         | R1 = 0.0268, wR2 = 0.0751                                               |                      |
| R indices (all data)                | R1 = 0.0329, wR2 = 0.0774                                               |                      |
| Largest diff. peak and hole         | 0.626 and -0.215 e.Å <sup>-3</sup>                                      |                      |
| Crystallisation Details:            | DCM/ <i>n</i> -hexane                                                   |                      |
| Solution:                           | SHELXT-2014/5 (G. M. Sheldrick, Acta Cryst., 2015, A71, 3-8)            |                      |
| Refinement:                         | SHELXL-2018/3 (G. M. Sheldrick, Acta Cryst. (2008), A64, 112-122)       |                      |
| Interface:                          | OLEX2 v1.2 (O. V. Dolomanov et al., J. Appl. Cryst., 2009, 42, 339-341) |                      |
| Measurement and Refinement Details: | -                                                                       |                      |

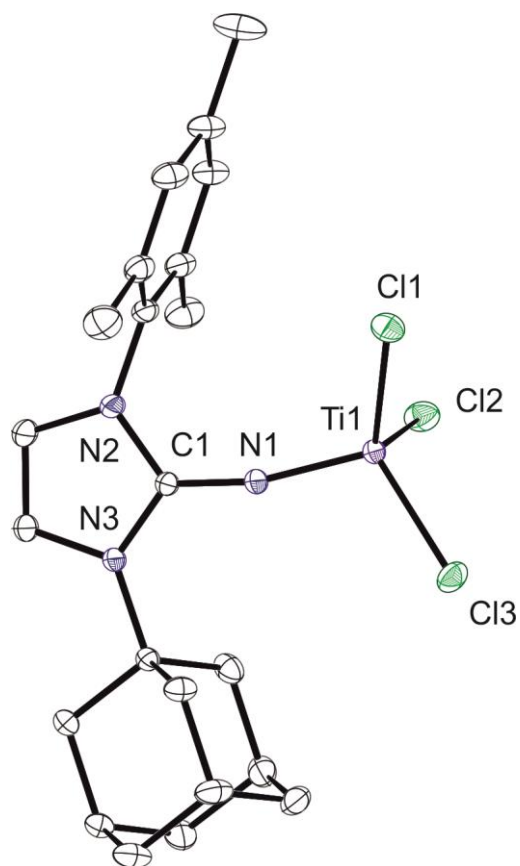

Figure S6: Molecular structure of **4a** with thermal displacement parameters drawn at 50% probability. All hydrogens are omitted for clarity. Selected bond lengths [Å] and angles [°]: C1-N1 1.3265(7), N1-Ti1 1.7347(5), N2-C1-N3 107.41(4), C1-N1-Ti1 162.58(5), Cl1-Ti-Cl2 111.50(2), N1-C1-N2 124.07(5), N1-C1-N3 128.50(5).

## 2.7 [(Im<sup>AdDippN</sup>)TiCl<sub>3</sub>] CH<sub>2</sub>Cl<sub>2</sub>·Solv (4b)

|                                   |                                                                         |                            |
|-----------------------------------|-------------------------------------------------------------------------|----------------------------|
| Identification code               | mk26mk                                                                  |                            |
| CCDC Number:                      | 2174870                                                                 |                            |
| Empirical formula                 | C <sub>26</sub> H <sub>36</sub> Cl <sub>5</sub> N <sub>3</sub> Ti       |                            |
| Formula weight                    | 615.73                                                                  |                            |
| Temperature                       | 100(2) K                                                                |                            |
| Wavelength                        | 0.71073 Å                                                               |                            |
| Instrument (scan mode)            | XtaLAB Synergy, Single source, HyPix ( $\omega$ scan)                   |                            |
| Crystal system                    | Triclinic                                                               |                            |
| Space group                       | $P\bar{1}$                                                              |                            |
| Unit cell dimensions              | a = 9.8202(4) Å                                                         | $\alpha = 63.091(5)^\circ$ |
|                                   | b = 13.2868(6) Å                                                        | $\beta = 81.445(4)^\circ$  |
|                                   | c = 14.4204(7) Å                                                        | $\gamma = 76.358(4)^\circ$ |
| Volume                            | 1628.59(15) Å <sup>3</sup>                                              |                            |
| Z                                 | 2                                                                       |                            |
| Density (calculated)              | 1.256 Mg/m <sup>3</sup>                                                 |                            |
| Absorption coefficient            | 0.691 mm <sup>-1</sup>                                                  |                            |
| F(000)                            | 640                                                                     |                            |
| Crystal habitus                   | fragment of block (orange)                                              |                            |
| Crystal size                      | 0.18 x 0.10 x 0.05 mm <sup>3</sup>                                      |                            |
| Theta range for data collection   | 2.137 to 32.385°                                                        |                            |
| Index ranges                      | -14 ≤ h ≤ 14, -19 ≤ k ≤ 19, -21 ≤ l ≤ 20                                |                            |
| Reflections collected             | 43682                                                                   |                            |
| Independent reflections           | 9833 [R(int) = 0.0215]                                                  |                            |
| Completeness to theta = 25.242°   | 99.9 %                                                                  |                            |
| Absorption correction             | Semi-empirical from equivalents                                         |                            |
| Max. and min. transmission        | 1.00000 and 0.88732                                                     |                            |
| Refinement method                 | Full-matrix least-squares on F <sup>2</sup>                             |                            |
| Data / restraints / parameters    | 9833 / 0 / 320                                                          |                            |
| Goodness-of-fit on F <sup>2</sup> | 1.030                                                                   |                            |
| Final R indices [I > 2σ(I)]       | R1 = 0.0581, wR2 = 0.1560                                               |                            |
| R indices (all data)              | R1 = 0.0667, wR2 = 0.1618                                               |                            |
| Largest diff. peak and hole       | 2.297 and -1.603 e.Å <sup>-3</sup>                                      |                            |
| Crystallisation Details:          | dichloromethane/ <i>n</i> -hexane -30 °C                                |                            |
| Solution:                         | SHELXT-2014/5 (G. M. Sheldrick, Acta Cryst., 2015, A71, 3-8)            |                            |
| Refinement:                       | SHELXL-2018/3 (G. M. Sheldrick, Acta Cryst. (2008), A64, 112-122)       |                            |
| Interface:                        | OLEX2 v1.2 (O. V. Dolomanov et al., J. Appl. Cryst., 2009, 42, 339-341) |                            |

Measurement and Refinement Details: A solvent mask was calculated and 66 electrons were found in a volume of 231 Å<sup>3</sup> in 1 void per unit cell. This is consistent with the presence of 0.5[CH<sub>2</sub>Cl<sub>2</sub>], 0.25[C<sub>6</sub>H<sub>14</sub>] per Asymmetric Unit which account for 67 electrons per unit cell. A reason why the molecules could not be refined satisfactorily might be their disorder along a canal. Additionally modulation could be a reason, as 'smeared' reflexes were observed along the c\* axis.

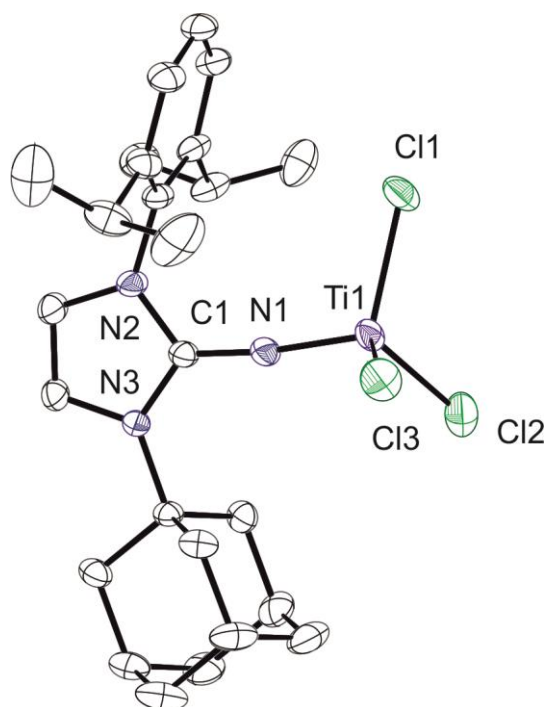

Figure S7: Molecular structure of **4b**·CH<sub>2</sub>Cl<sub>2</sub>·Solv. with thermal displacement parameters drawn at 50% probability. All hydrogens, one molecule of CH<sub>2</sub>Cl<sub>2</sub> and disordered solvent molecules are omitted for clarity. Selected bond lengths [Å] and angles [°]: C1-N1 1.330(3), N1-Ti1 1.7316(17), N2-C1-N3 106.89(17), C1-N1-Ti1 173.04(16), Cl1-Ti1-Cl2 109.17(3), N1-C1-N2 124.33(17), 128.75(18).

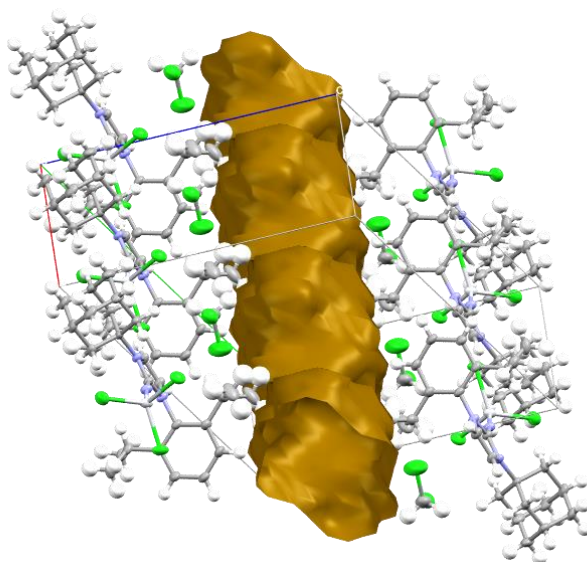

Figure S8: Depiction of the solvent accessible voids in the structure of **4b** in Mercury.

## 2.8 [Cp(Im<sup>AdMes</sup>N)TiCl<sub>2</sub>] (5a)

|                                     |                                                                                                                                |
|-------------------------------------|--------------------------------------------------------------------------------------------------------------------------------|
| Identification code                 | mk22mk                                                                                                                         |
| CCDC Number:                        | 2174871                                                                                                                        |
| Empirical formula                   | C <sub>27</sub> H <sub>33</sub> Cl <sub>2</sub> N <sub>3</sub> Ti                                                              |
| Formula weight                      | 518.36                                                                                                                         |
| Temperature                         | 100(2) K                                                                                                                       |
| Wavelength                          | 1.54184 Å                                                                                                                      |
| Instrument (scan mode)              | XtaLAB Synergy, Single source, HyPix ( $\omega$ scan)                                                                          |
| Crystal system                      | Orthorhombic                                                                                                                   |
| Space group                         | <i>P</i> 2 <sub>1</sub> 2 <sub>1</sub> 2 <sub>1</sub>                                                                          |
| Unit cell dimensions                | $a = 9.97590(10)$ Å $\alpha = 90^\circ$<br>$b = 11.30190(10)$ Å $\beta = 90^\circ$<br>$c = 22.11580(10)$ Å $\gamma = 90^\circ$ |
| Volume                              | 2493.48(4) Å <sup>3</sup>                                                                                                      |
| Z                                   | 4                                                                                                                              |
| Density (calculated)                | 1.381 Mg/m <sup>3</sup>                                                                                                        |
| Absorption coefficient              | 5.029 mm <sup>-1</sup>                                                                                                         |
| F(000)                              | 1088                                                                                                                           |
| Crystal habitus                     | trapezoid (orange)                                                                                                             |
| Crystal size                        | 0.228 x 0.126 x 0.072 mm <sup>3</sup>                                                                                          |
| Theta range for data collection     | 3.998 to 77.473°                                                                                                               |
| Index ranges                        | -12 ≤ <i>h</i> ≤ 10, -14 ≤ <i>k</i> ≤ 14, -27 ≤ <i>l</i> ≤ 28                                                                  |
| Reflections collected               | 53498                                                                                                                          |
| Independent reflections             | 5264 [R(int) = 0.0323]                                                                                                         |
| Completeness to theta = 67.684°     | 100.0 %                                                                                                                        |
| Absorption correction               | Gaussian                                                                                                                       |
| Max. and min. transmission          | 1.000 and 0.670                                                                                                                |
| Refinement method                   | Full-matrix least-squares on F <sup>2</sup>                                                                                    |
| Data / restraints / parameters      | 5264 / 0 / 302                                                                                                                 |
| Goodness-of-fit on F <sup>2</sup>   | 1.033                                                                                                                          |
| Final R indices [I > 2σ(I)]         | R1 = 0.0218, wR2 = 0.0504                                                                                                      |
| R indices (all data)                | R1 = 0.0227, wR2 = 0.0513                                                                                                      |
| Absolute structure parameter        | 0.434(5)                                                                                                                       |
| Largest diff. peak and hole         | 0.242 and -0.226 e.Å <sup>-3</sup>                                                                                             |
| Crystallisation Details:            | toluene/ <i>n</i> -hexane room temperature                                                                                     |
| Solution:                           | SHELXT-2014/5 (G. M. Sheldrick, Acta Cryst., 2015, A71, 3-8)                                                                   |
| Refinement:                         | SHELXL-2018/3 (G. M. Sheldrick, Acta Cryst., 2008, A64, 112-122)                                                               |
| Interface:                          | OLEX2 v1.2 (O. V. Dolomanov et al., J. Appl. Cryst., 2009, 42, 339-341)                                                        |
| Measurement and Refinement Details: | Refined as a 2-component inversion twin.                                                                                       |

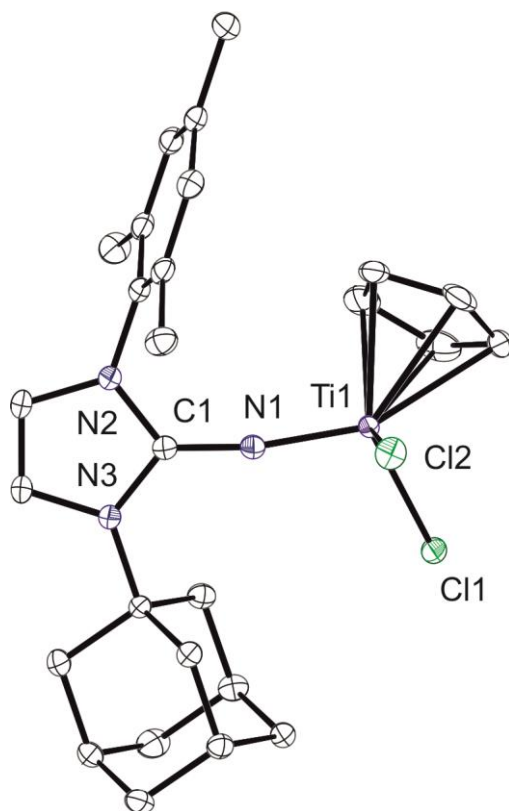

Figure S9: Molecular structure of **5a** with thermal displacement parameters drawn at 50% probability. All hydrogens are omitted for clarity. Selected bond lengths [Å] and angles [°]: C1-N1 1.319(2), N1-Ti1 1.7758(16), Ti1-Cl1 2.3135(5), Ti1-Cl2 2.3156(5), Ti1-C<sub>5</sub>H<sub>5</sub><sup>Centroid</sup> 2.0562(9), N2-C1-N3 105.99(15), C1-N1-Ti1 170.26(14), Cl1-Ti1-Cl2 101.87(2), N1-C1-N2 125.66(16), N1-C1-N3 128.31(16).



## 2.9 [Cp(Im<sup>AdDipp</sup>N)TiCl<sub>2</sub>] (5b)

|                                     |                                                                         |                            |
|-------------------------------------|-------------------------------------------------------------------------|----------------------------|
| Identification code                 | mk27mk                                                                  |                            |
| CCDC Number:                        | 2174872                                                                 |                            |
| Empirical formula                   | C <sub>30</sub> H <sub>39</sub> Cl <sub>2</sub> N <sub>3</sub> Ti       |                            |
| Formula weight                      | 560.44                                                                  |                            |
| Temperature                         | 100(2) K                                                                |                            |
| Wavelength                          | 0.71073 Å                                                               |                            |
| Instrument (scan mode)              | XtaLAB Synergy, Single source, HyPix ( $\omega$ scan)                   |                            |
| Crystal system                      | Monoclinic                                                              |                            |
| Space group                         | <i>P2<sub>1</sub>/n</i>                                                 |                            |
| Unit cell dimensions                | a = 10.3898(2) Å                                                        | $\alpha = 90^\circ$        |
|                                     | b = 19.4721(2) Å                                                        | $\beta = 101.575(2)^\circ$ |
|                                     | c = 13.9922(2) Å                                                        | $\gamma = 90^\circ$        |
| Volume                              | 2773.21(7) Å <sup>3</sup>                                               |                            |
| Z                                   | 4                                                                       |                            |
| Density (calculated)                | 1.342 Mg/m <sup>3</sup>                                                 |                            |
| Absorption coefficient              | 0.526 mm <sup>-1</sup>                                                  |                            |
| F(000)                              | 1184                                                                    |                            |
| Crystal habitus                     | fragment of trapezoid (orange)                                          |                            |
| Crystal size                        | 0.221 x 0.207 x 0.148 mm <sup>3</sup>                                   |                            |
| Theta range for data collection     | 2.240 to 38.315°                                                        |                            |
| Index ranges                        | -17 ≤ h ≤ 17, -33 ≤ k ≤ 33, -24 ≤ l ≤ 24                                |                            |
| Reflections collected               | 193977                                                                  |                            |
| Independent reflections             | 14793 [R(int) = 0.0306]                                                 |                            |
| Completeness to theta = 25.242°     | 99.9 %                                                                  |                            |
| Absorption correction               | Semi-empirical from equivalents                                         |                            |
| Max. and min. transmission          | 1.00000 and 0.89211                                                     |                            |
| Refinement method                   | Full-matrix least-squares on F <sup>2</sup>                             |                            |
| Data / restraints / parameters      | 14793 / 0 / 329                                                         |                            |
| Goodness-of-fit on F <sup>2</sup>   | 1.070                                                                   |                            |
| Final R indices [I > 2σ(I)]         | R1 = 0.0307, wR2 = 0.0836                                               |                            |
| R indices (all data)                | R1 = 0.0358, wR2 = 0.0856                                               |                            |
| Largest diff. peak and hole         | 0.842 and -0.715 e.Å <sup>-3</sup>                                      |                            |
| Crystallisation Details:            | dichloromethane/ <i>n</i> -hexane room temperature                      |                            |
| Solution:                           | SHELXT-2014/5 (G. M. Sheldrick, Acta Cryst., 2015, A71, 3-8)            |                            |
| Refinement:                         | SHELXL-2018/3 (G. M. Sheldrick, Acta Cryst. (2008), A64, 112-122)       |                            |
| Interface:                          | OLEX2 v1.2 (O. V. Dolomanov et al., J. Appl. Cryst., 2009, 42, 339-341) |                            |
| Measurement and Refinement Details: | -                                                                       |                            |

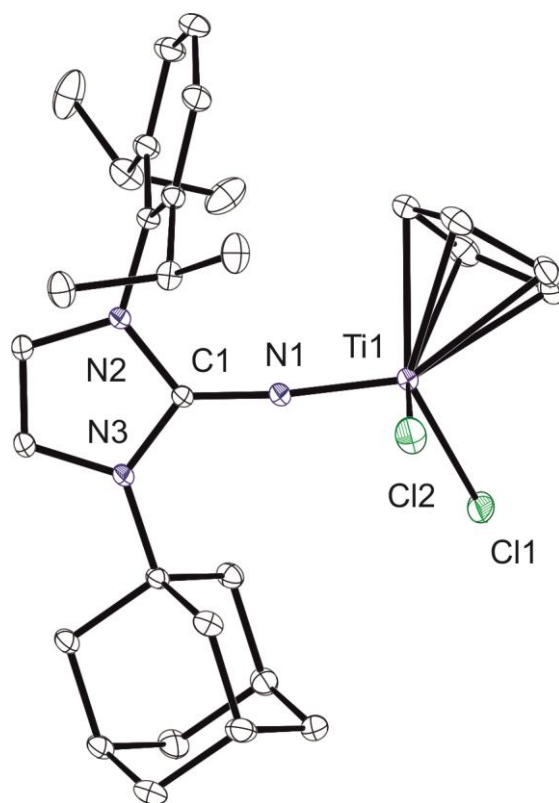

Figure S10: Molecular structure of **5b** with thermal displacement parameters drawn at 50% probability. All hydrogens are omitted for clarity. Selected bond lengths [Å] and angles [°]: C1-N1 1.3189(8), N1-Ti1 1.7760(5), Ti1-Cl1 2.3074(3), Ti1-Cl2 2.3117(2), Ti1-C<sub>5</sub>H<sub>5</sub><sup>Centroid</sup> 2.0689(4), N2-C1-N3 106.13(5), C1-N1-Ti1 170.86(5), Cl1-Ti1-Cl2 102.873(11), N1-C1-N2 125.75(6), N1-C1-N3 128.10(6).

## 2.10 [(Im<sup>AdMes</sup>N)<sub>2</sub>TiCl<sub>2</sub>]-0.5CH<sub>2</sub>Cl<sub>2</sub> (6a)

|                                     |                                                                                                                                                                                                                                                                                                              |                        |
|-------------------------------------|--------------------------------------------------------------------------------------------------------------------------------------------------------------------------------------------------------------------------------------------------------------------------------------------------------------|------------------------|
| Identification code                 | mk19mk                                                                                                                                                                                                                                                                                                       |                        |
| CCDC Number:                        | 2174873                                                                                                                                                                                                                                                                                                      |                        |
| Empirical formula                   | C <sub>44.5</sub> H <sub>57</sub> Cl <sub>3</sub> N <sub>6</sub> Ti                                                                                                                                                                                                                                          |                        |
| Formula weight                      | 830.21                                                                                                                                                                                                                                                                                                       |                        |
| Temperature                         | 100(2) K                                                                                                                                                                                                                                                                                                     |                        |
| Wavelength                          | 1.54184 Å                                                                                                                                                                                                                                                                                                    |                        |
| Instrument (scan mode)              | XtaLAB Synergy, Single source, HyPix ( $\omega$ scan)                                                                                                                                                                                                                                                        |                        |
| Crystal system                      | Monoclinic                                                                                                                                                                                                                                                                                                   |                        |
| Space group                         | <i>P</i> 2 <sub>1</sub> / <i>n</i>                                                                                                                                                                                                                                                                           |                        |
| Unit cell dimensions                | <i>a</i> = 13.24640(4) Å                                                                                                                                                                                                                                                                                     | $\alpha$ = 90°         |
|                                     | <i>b</i> = 13.47847(4) Å                                                                                                                                                                                                                                                                                     | $\beta$ = 101.0795(3)° |
|                                     | <i>c</i> = 24.79338(8) Å                                                                                                                                                                                                                                                                                     | $\gamma$ = 90°         |
| Volume                              | 4344.13(2) Å <sup>3</sup>                                                                                                                                                                                                                                                                                    |                        |
| Z                                   | 4                                                                                                                                                                                                                                                                                                            |                        |
| Density (calculated)                | 1.269 Mg/m <sup>3</sup>                                                                                                                                                                                                                                                                                      |                        |
| Absorption coefficient              | 3.655 mm <sup>-1</sup>                                                                                                                                                                                                                                                                                       |                        |
| F(000)                              | 1756                                                                                                                                                                                                                                                                                                         |                        |
| Crystal habitus                     | irregular (orange)                                                                                                                                                                                                                                                                                           |                        |
| Crystal size                        | 0.253 x 0.110 x 0.098 mm <sup>3</sup>                                                                                                                                                                                                                                                                        |                        |
| Theta range for data collection     | 3.534 to 77.822°                                                                                                                                                                                                                                                                                             |                        |
| Index ranges                        | -16 ≤ <i>h</i> ≤ 16, -17 ≤ <i>k</i> ≤ 17, -31 ≤ <i>l</i> ≤ 28                                                                                                                                                                                                                                                |                        |
| Reflections collected               | 94547                                                                                                                                                                                                                                                                                                        |                        |
| Independent reflections             | 9180 [R(int) = 0.0312]                                                                                                                                                                                                                                                                                       |                        |
| Completeness to theta = 67.684°     | 100.0 %                                                                                                                                                                                                                                                                                                      |                        |
| Absorption correction               | Gaussian                                                                                                                                                                                                                                                                                                     |                        |
| Max. and min. transmission          | 1.000 and 0.531                                                                                                                                                                                                                                                                                              |                        |
| Refinement method                   | Full-matrix least-squares on F <sup>2</sup>                                                                                                                                                                                                                                                                  |                        |
| Data / restraints / parameters      | 9180 / 6 / 596                                                                                                                                                                                                                                                                                               |                        |
| Goodness-of-fit on F <sup>2</sup>   | 1.069                                                                                                                                                                                                                                                                                                        |                        |
| Final R indices [I > 2σ(I)]         | R1 = 0.0450, wR2 = 0.1290                                                                                                                                                                                                                                                                                    |                        |
| R indices (all data)                | R1 = 0.0462, wR2 = 0.1308                                                                                                                                                                                                                                                                                    |                        |
| Largest diff. peak and hole         | 1.180 and -0.885 e.Å <sup>-3</sup>                                                                                                                                                                                                                                                                           |                        |
| Crystallisation Details:            | CH <sub>2</sub> Cl <sub>2</sub> / <i>n</i> -hexane at room temperature                                                                                                                                                                                                                                       |                        |
| Solution:                           | SHELXT-2014/5 (G. M. Sheldrick, Acta Cryst., 2015, A71, 3-8)                                                                                                                                                                                                                                                 |                        |
| Refinement:                         | SHELXL-2018/3 (G. M. Sheldrick, Acta Cryst., 2008, A64, 112-122)                                                                                                                                                                                                                                             |                        |
| Interface:                          | OLEX2 v1.2 (O. V. Dolomanov et al., J. Appl. Cryst., 2009, 42, 339-341)                                                                                                                                                                                                                                      |                        |
| Measurement and Refinement Details: | The CH <sub>2</sub> Cl <sub>2</sub> fragment is disordered over an inversion center and occupies a special position. Therefore, its occupancy was set at 0.5 and refined accordingly. Additionally the mesityl group on one ligand is disordered and was refined accordingly resulting in a 60/40 occupancy. |                        |

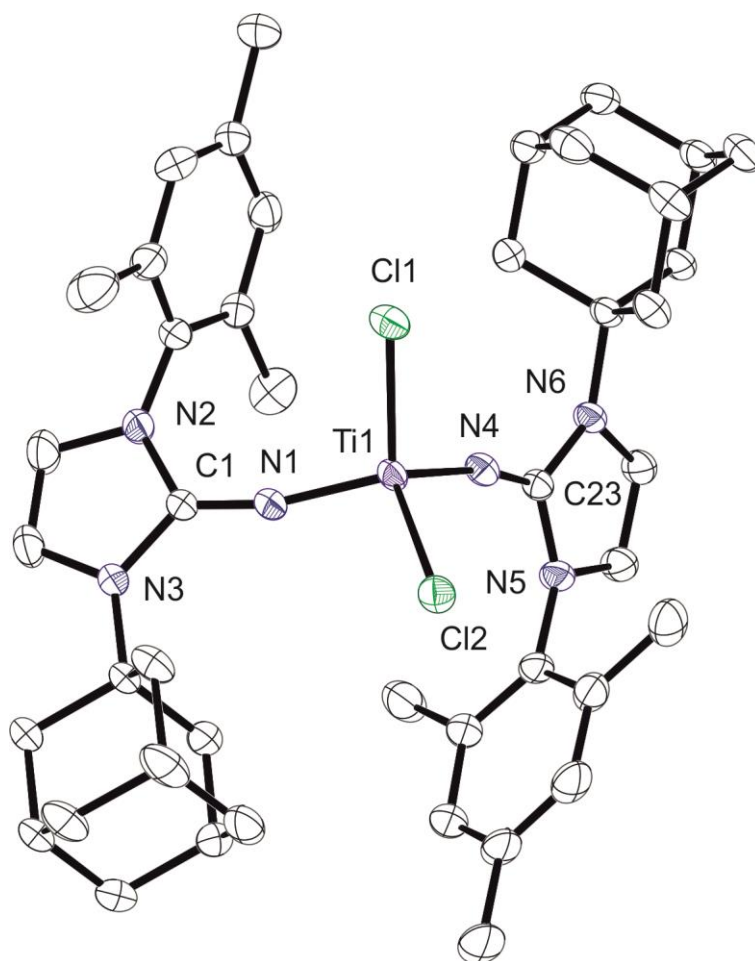

Figure S11: Molecular structure of the main component of **6a**·0.5CH<sub>2</sub>Cl<sub>2</sub> with thermal displacement parameters drawn at 50% probability. All hydrogens, 0.5 molecules of CH<sub>2</sub>Cl<sub>2</sub> and the minor component of the disordered mesityl group at N5 are omitted for clarity. Selected bond lengths [Å] and angles [°]: C1-N1 1.304(2), C23-N4 1.302(2), N1-Ti1 1.7951(15), N4-Ti1 1.7867(16), Ti1-Cl1 2.2938(5), Ti1-Cl2 2.3160(5), N2-C1-N3 105.89(14), N5-C23-N6 105.69(15), C1-N1-Ti1 166.51(13), C23-N4-Ti1 166.94(13), Cl1-Ti1-Cl2 109.49(2), N1-Ti1-N4 113.57(8).

## 2.11 [(Im<sup>AdDipp</sup>N)<sub>2</sub>TiCl<sub>2</sub>]<sub>2</sub>·CH<sub>2</sub>Cl<sub>2</sub> (6b)

|                                     |                                                                         |                       |
|-------------------------------------|-------------------------------------------------------------------------|-----------------------|
| Identification code                 | mk24mk2                                                                 |                       |
| CCDC Number:                        | 2174874                                                                 |                       |
| Empirical formula                   | C <sub>51</sub> H <sub>70</sub> Cl <sub>4</sub> N <sub>6</sub> Ti       |                       |
| Formula weight                      | 956.83                                                                  |                       |
| Temperature                         | 100(2) K                                                                |                       |
| Wavelength                          | 1.54184 Å                                                               |                       |
| Instrument (scan mode)              | XtaLAB Synergy, Single source, HyPix ( $\omega$ scan)                   |                       |
| Crystal system                      | Monoclinic                                                              |                       |
| Space group                         | <i>P</i> 2 <sub>1</sub> / <i>c</i>                                      |                       |
| Unit cell dimensions                | <i>a</i> = 16.9882(3) Å                                                 | $\alpha$ = 90°        |
|                                     | <i>b</i> = 18.0462(2) Å                                                 | $\beta$ = 116.512(2)° |
|                                     | <i>c</i> = 18.3671(3) Å                                                 | $\gamma$ = 90°        |
| Volume                              | 5038.71(15) Å <sup>3</sup>                                              |                       |
| Z                                   | 4                                                                       |                       |
| Density (calculated)                | 1.261 Mg/m <sup>3</sup>                                                 |                       |
| Absorption coefficient              | 3.694 mm <sup>-1</sup>                                                  |                       |
| F(000)                              | 2032                                                                    |                       |
| Crystal habitus                     | needle (orange)                                                         |                       |
| Crystal size                        | 0.135 x 0.080 x 0.051 mm <sup>3</sup>                                   |                       |
| Theta range for data collection     | 2.907 to 77.812°                                                        |                       |
| Index ranges                        | -21 ≤ <i>h</i> ≤ 21, -19 ≤ <i>k</i> ≤ 22, -23 ≤ <i>l</i> ≤ 23           |                       |
| Reflections collected               | 122767                                                                  |                       |
| Independent reflections             | 10633 [R(int) = 0.0647]                                                 |                       |
| Completeness to theta = 67.684°     | 100.0 %                                                                 |                       |
| Absorption correction               | Semi-empirical from equivalents                                         |                       |
| Max. and min. transmission          | 1.00000 and 0.58339                                                     |                       |
| Refinement method                   | Full-matrix least-squares on F <sup>2</sup>                             |                       |
| Data / restraints / parameters      | 10633 / 6 / 567                                                         |                       |
| Goodness-of-fit on F <sup>2</sup>   | 1.076                                                                   |                       |
| Final R indices [I > 2σ(I)]         | R1 = 0.0561, wR2 = 0.1599                                               |                       |
| R indices (all data)                | R1 = 0.0606, wR2 = 0.1649                                               |                       |
| Largest diff. peak and hole         | 0.813 and -1.177 e.Å <sup>-3</sup>                                      |                       |
| Crystallisation Details:            | dichloromethane/ <i>n</i> -hexane room temperature                      |                       |
| Solution:                           | SHELXT-2014/5 (G. M. Sheldrick, Acta Cryst., 2015, A71, 3-8)            |                       |
| Refinement:                         | SHELXL-2018/3 (G. M. Sheldrick, Acta Cryst., 2008, A64, 112-122)        |                       |
| Interface:                          | OLEX2 v1.2 (O. V. Dolomanov et al., J. Appl. Cryst., 2009, 42, 339-341) |                       |
| Measurement and Refinement Details: | Data had to be cut due to sample decay.                                 |                       |

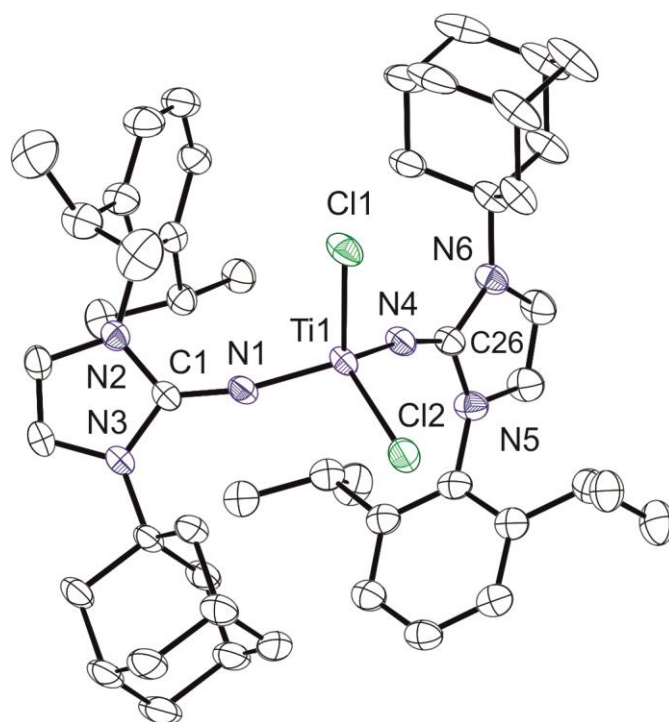

Figure S12: Molecular structure of the main component of **6b**·CH<sub>2</sub>Cl<sub>2</sub> with thermal displacement parameters drawn at 50% probability. All hydrogens and one molecule of CH<sub>2</sub>Cl<sub>2</sub> are omitted for clarity. Selected bond lengths [Å] and angles [°]: C1-N1 1.304(3), C26-N4 1.302(3), N1-Ti1 1.7994(18), N4-Ti1 1.8067(18), Ti1-Cl1 2.2836(6), Ti1-Cl2 2.3042(6), N2-C1-N3 105.69(18), N5-C26-N6 105.24(18), C1-N1-Ti1 167.14(17), C26-N4-Ti1 167.64(17), Cl1-Ti1-Cl2 105.19(3), N1-Ti1-N4 116.99(9).
